# Supplementary material for: Deficiency of Capicua disrupts bile acid homeostasis
Source: PubMed Central journal article supplement — Sci Rep. 2015 Feb 5;5:8272. doi: 10.1038/srep08272 (PMC4317698; doi:10.1038/srep08272), 2015-02-05
Supplement: srep08272-s1.pdf [file srep08272-s1.pdf]

# SUPPLEMENTARY INFORMATION

## Deficiency of *Capicua* disrupts bile acid homeostasis.

Eunjeong Kim, Sungjun Park, Nahyun Choi, Jieon Lee, Jeehyun Yoe, Soeun Kim, Hyeon Jung, Kyong-Tai Kim, Hyojin Kang, John D. Fryer, Huda Y. Zoghbi, Daehee Hwang and Yoontae Lee

### Supplementary Figures

Figure S1. Less amount of bile in gallbladders of 18 day-old Cic-L KO mice compared with WT littermates.

Figure S2. Normal hepatic bile duct formation in Cic-L KO mice.

Figure S3. Induction of cholestatic liver damage in Cic-L KO mice fed with cholic acid.

Figure S4. Reduced target gene promoter occupancy of FOXA2 and RXR $\alpha$  in Cic-L KO liver.

Figure S5. A proposed model that describes how BA homeostasis is perturbed in Cic-L KO mice.

Figure S6. Up-regulation of *Etv4* gene in Cic-L KO liver.

Figure S7. Down-regulation of amino acid metabolism genes in Cic-L KO liver.

Figure S8. Unprocessed western blot images for Figure 1.

Figure S9. Unprocessed western blot images for Figure 4.

Figure S10. Unprocessed western blot images for Figure 5.

### Supplementary Tables

Table S1. The list of DEGs in liver of Cic-L KO mice at P18.

Table S2. Primers for quantitative real-time PCR

**WT**

**Cic-L KO**

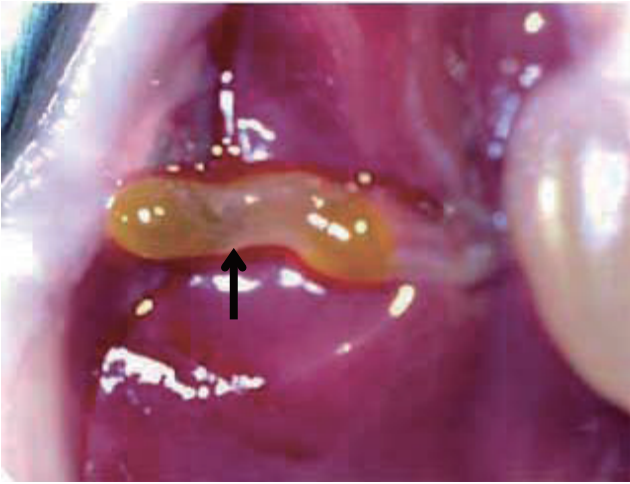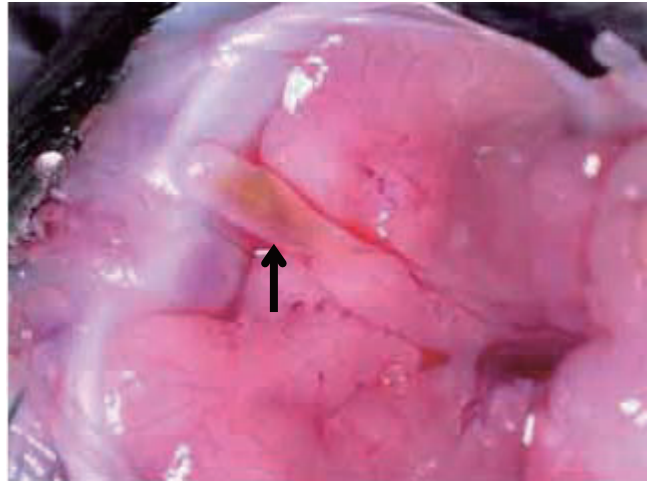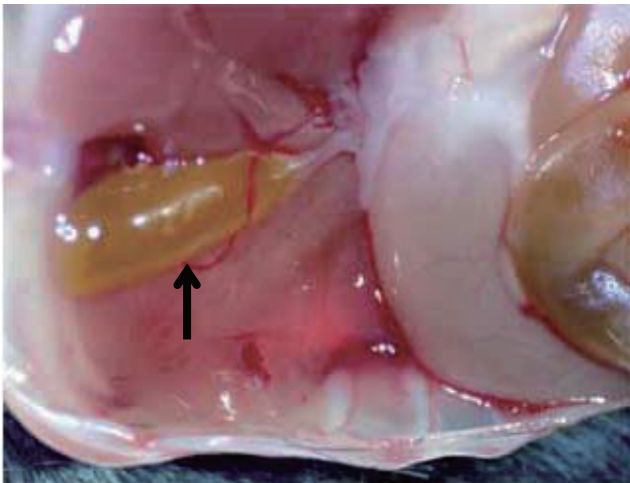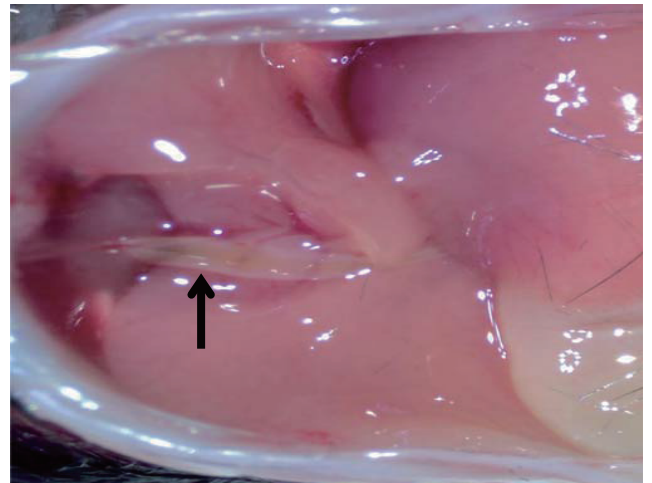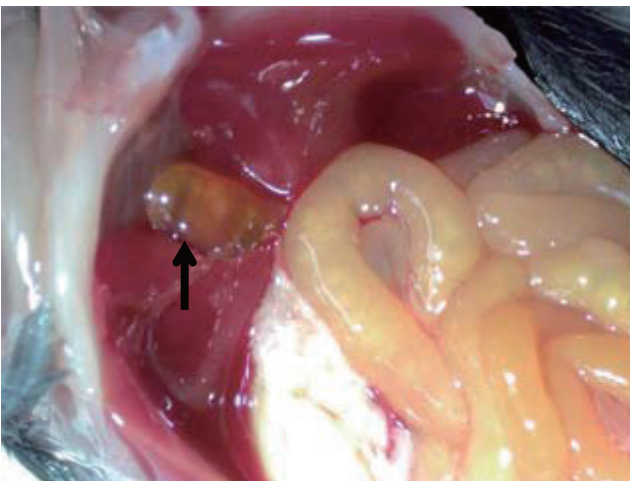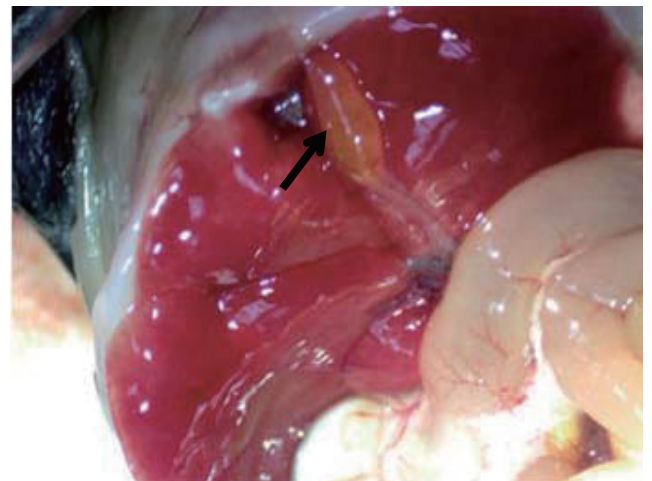

**Fig. S1. Less amount of bile in gallbladders of 18 day-old Cic-L KO mice compared with WT littermates. Arrows indicate gallbladders. The pictures were taken after fasting overnight .**

H&E staining (Livers from 18 day-old mice)

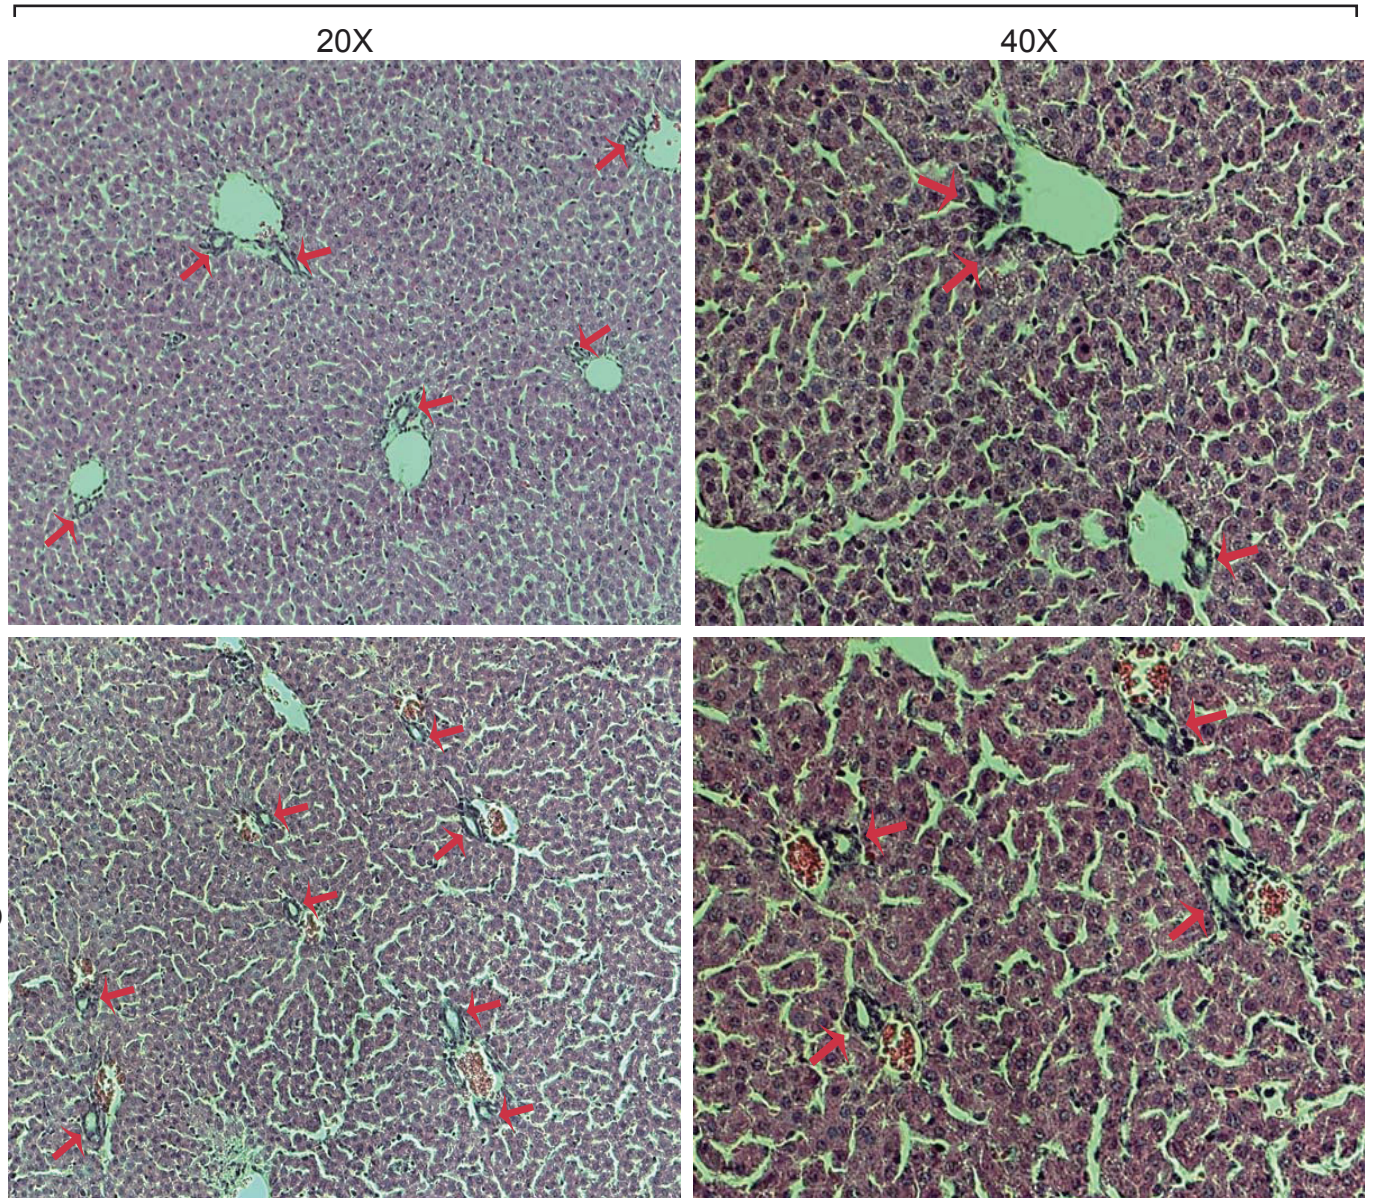

**Fig. S2. Normal hepatic bile duct formation in Cic-L KO mice.**

Liver tissues were prepared from WT and Cic-L KO mice at P18. The tissue sections were stained with hematoxylin and eosin (H&E). Arrows indicate hepatic bile ducts.

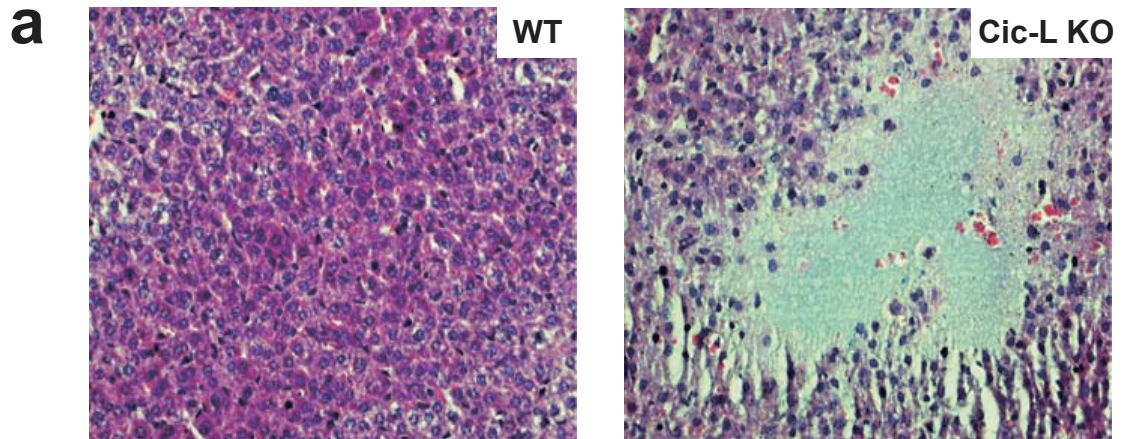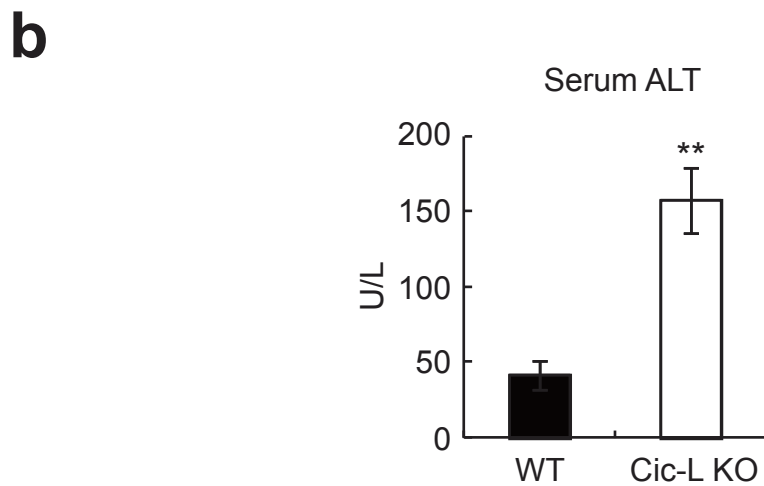

**Fig. S3. Induction of cholestatic liver damage in Cic-L KO mice fed with cholic acid.**

**a)** H&E staining showing necrotic area in liver section from Cic-L KO mouse. The liver tissues were dissected from 18 day-old WT and Cic-L KO mice fed with cholic acids through breast feeding from nursing female mice during post-natal growth. **b)** Significantly increased serum ALT levels in Cic-L KO mice fed cholic acids compared with WT at P18. Six mice per each genotype were used for this experiment. \*\*P<0.01. Error bars indicate s.e.m.

**a**

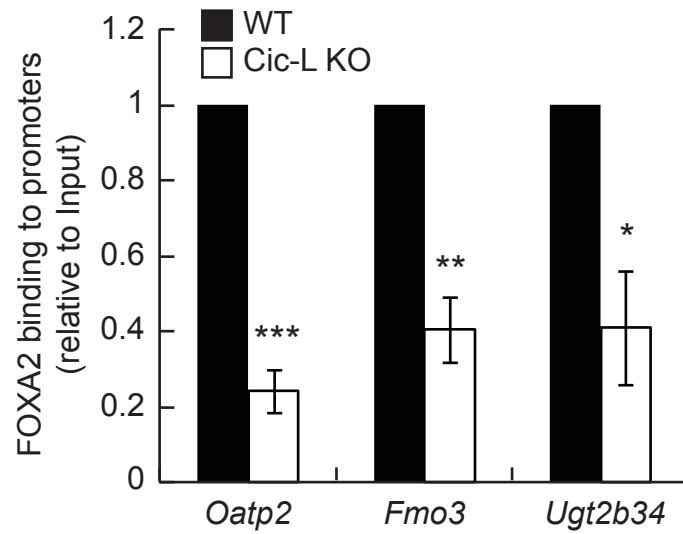

**b**

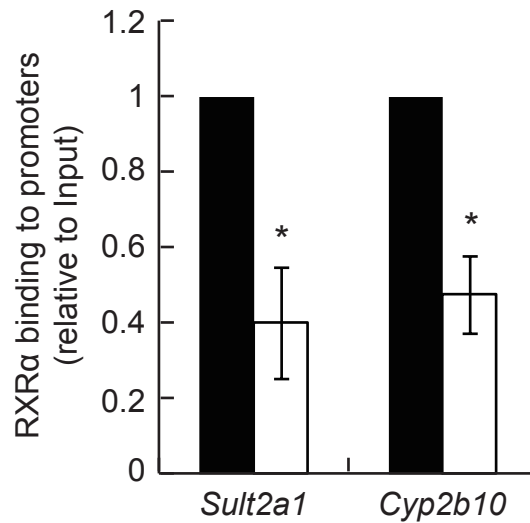

**Fig. S4. Reduced target gene promoter occupancy of FOXA2 and RXR $\alpha$  in Cic-L KO liver.**

**a)** ChIP-qPCR analysis for FOXA2 promoter occupancy of *Oatp2*, *Fmo3* and *Ugt2b34* in liver chromatin from WT or Cic-L KO mice at P18 (n=5~6 per each genotype). \*P<0.05, \*\*P<0.01, and \*\*\*P<0.001. All error bars show s.e.m.

**b)** ChIP-qPCR analysis for RXR $\alpha$  promoter occupancy of *Sult2a1* and *Cyp2b10* in liver chromatin from WT or Cic-L KO mice at P18 (n=3~4 per each genotype). \*P<0.05. All error bars show s.e.m.

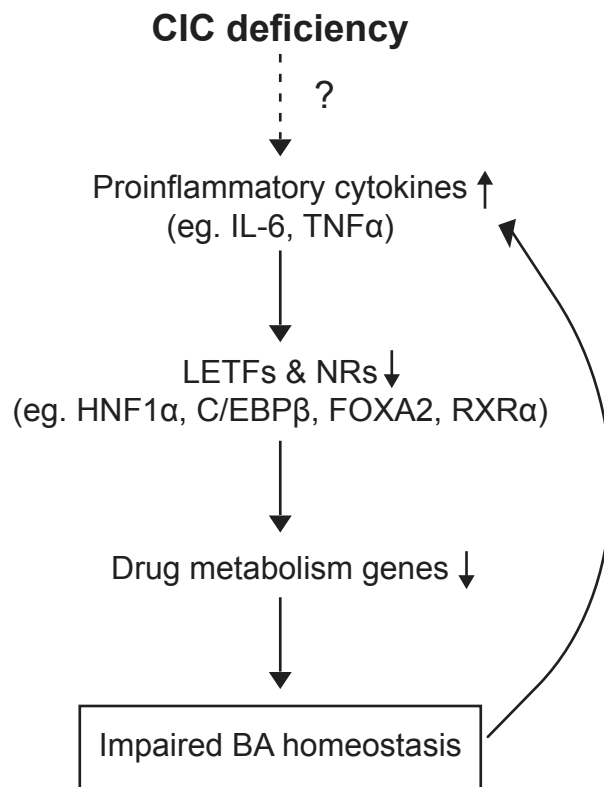

**Fig. S5. A proposed model that describes how BA homeostasis is perturbed in Cic-L KO mice.** LETF and NR stand for liver-enriched transcription factor and nuclear receptor, respectively. The question mark means unknown mechanism(s).

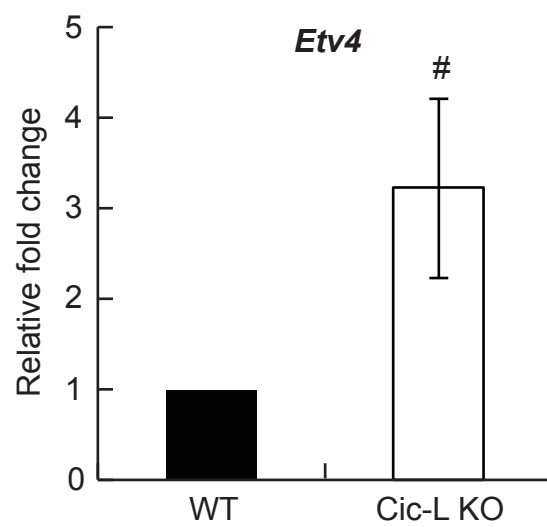

**Fig. S6. Up-regulation of *Etv4* gene in Cic-L KO liver.**  
qRT-PCR analysis for levels of *Etv4* in livers from 18 day-old WT and Cic-L KO mice. n=8, # P=0.0597. Error bar shows s.e.m.

**a**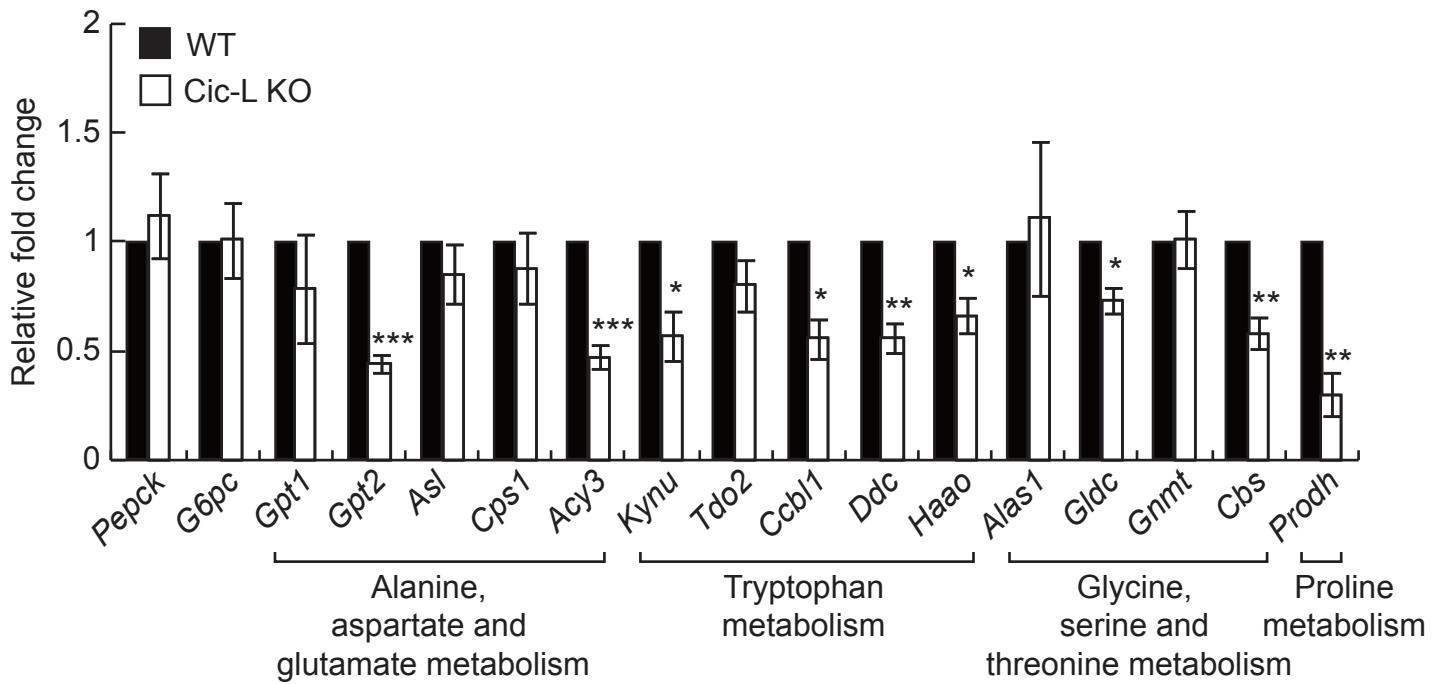**b**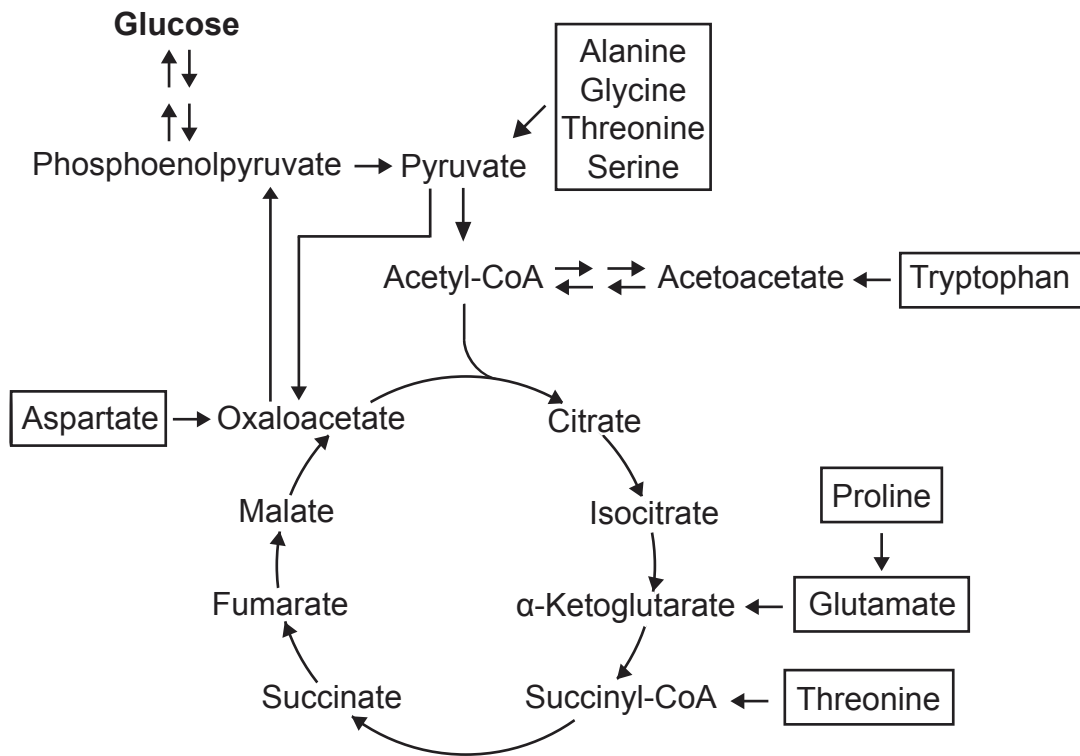

**Fig. S7. Down-regulation of amino acid metabolism genes in Cic-L KO liver.**

**a** qRT-PCR analysis for levels of genes involved in gluconeogenesis and amino acid metabolism in liver of WT and Cic-L KO mice at P18 (n=5). Pepck, phosphoenolpyruvate carboxykinase; G6pc, glucose 6-phosphatase; Gpt1, glutamic pyruvic transaminase, soluble; Gpt2, glutamic pyruvate transaminase 2; Asl, argininosuccinate lyase; Cps1, carbamoyl-phosphate synthetase 1; Acy3, aspartoacylase 3; Kynu, kynureninase; Tdo2, tryptophan 2,3-dioxygenase; Ccbl1, cysteine conjugate-beta lyase 1; Ddc, dopa decarboxylase; Haa0, 3-hydroxyanthranilate 3,4-dioxygenase; Alas1, aminolevulinic acid synthase 1; Gldc, glycine decarboxylase; Gnmt, glycine N-methyltransferase; Cbs, cystathionine beta-synthase; Prodh, proline dehydrogenase. \*P<0.05, \*\*P<0.01, and \*\*\*P<0.001. All error bars show s.e.m. **b**) Schematic illustration showing conversion of amino acids to the intermediates of carbohydrate metabolism that can subsequently give rise to glucose.



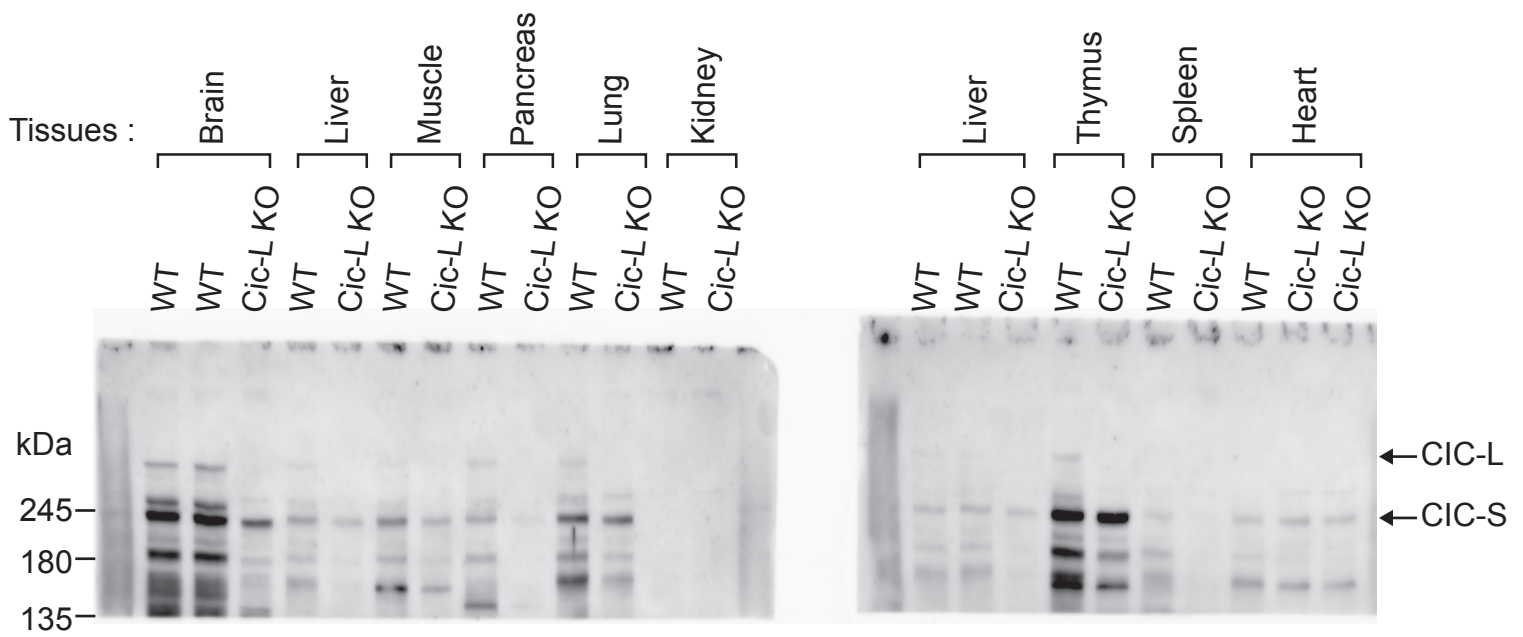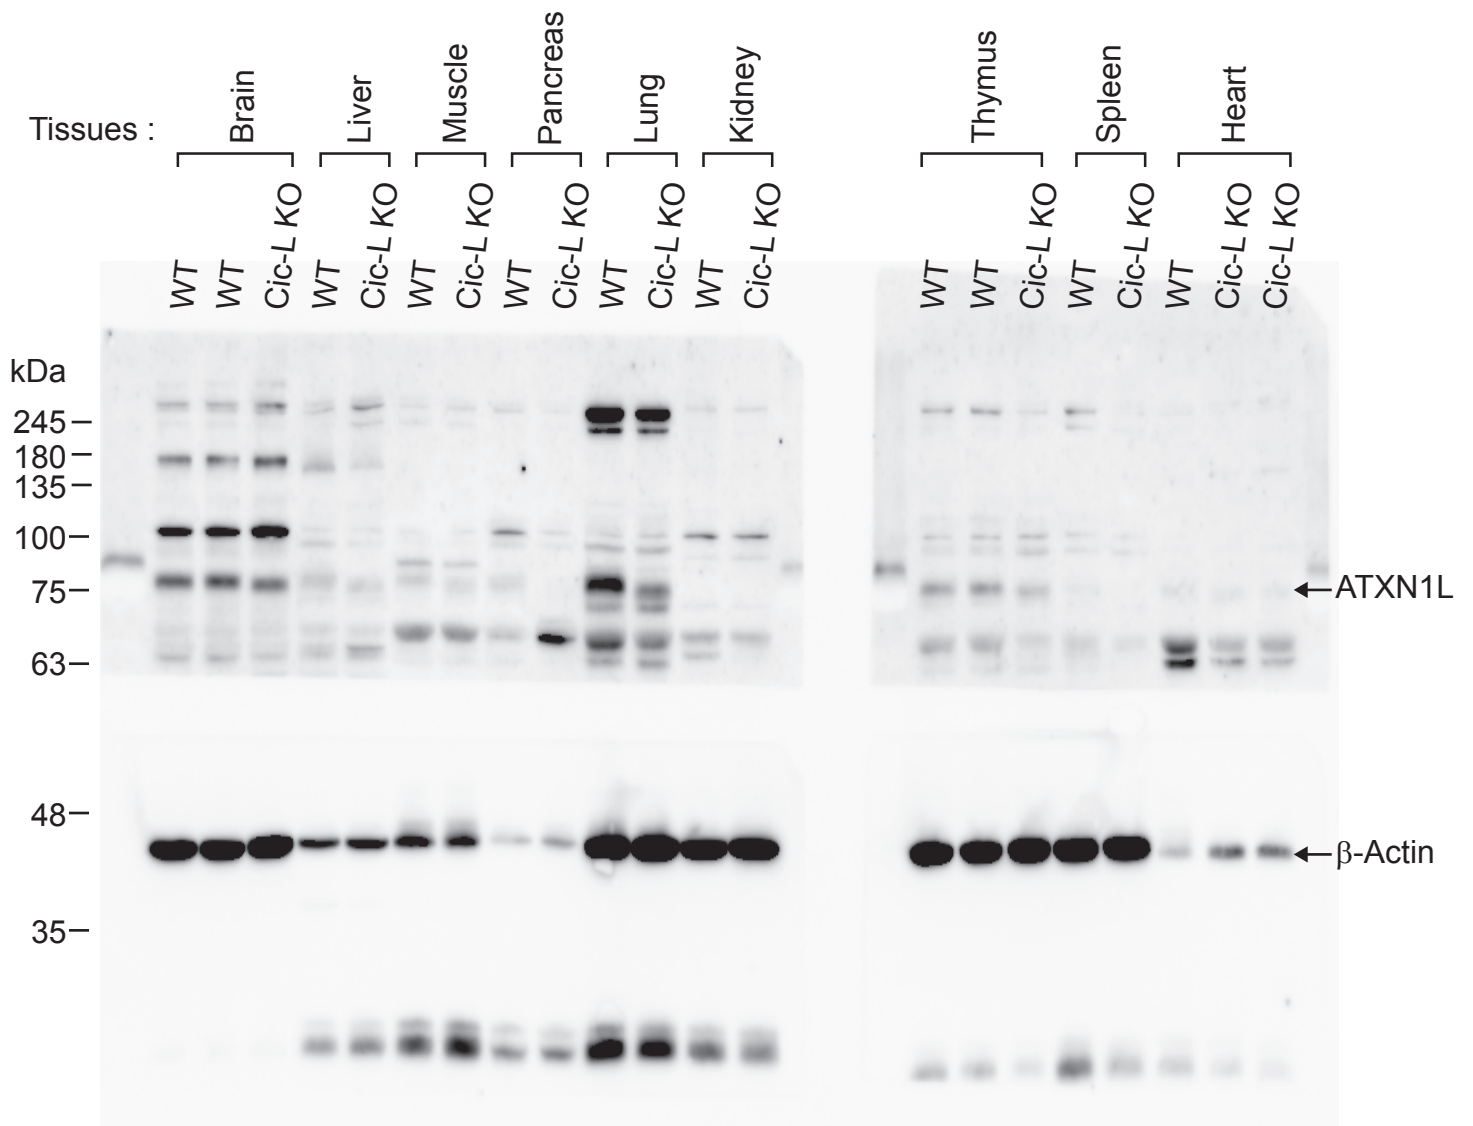

**Fig. S8. Unprocessed western blot images for Figure 1**

The western blot images were obtained using ImageQuant LAS 4000 (GE Healthcare Life Science).

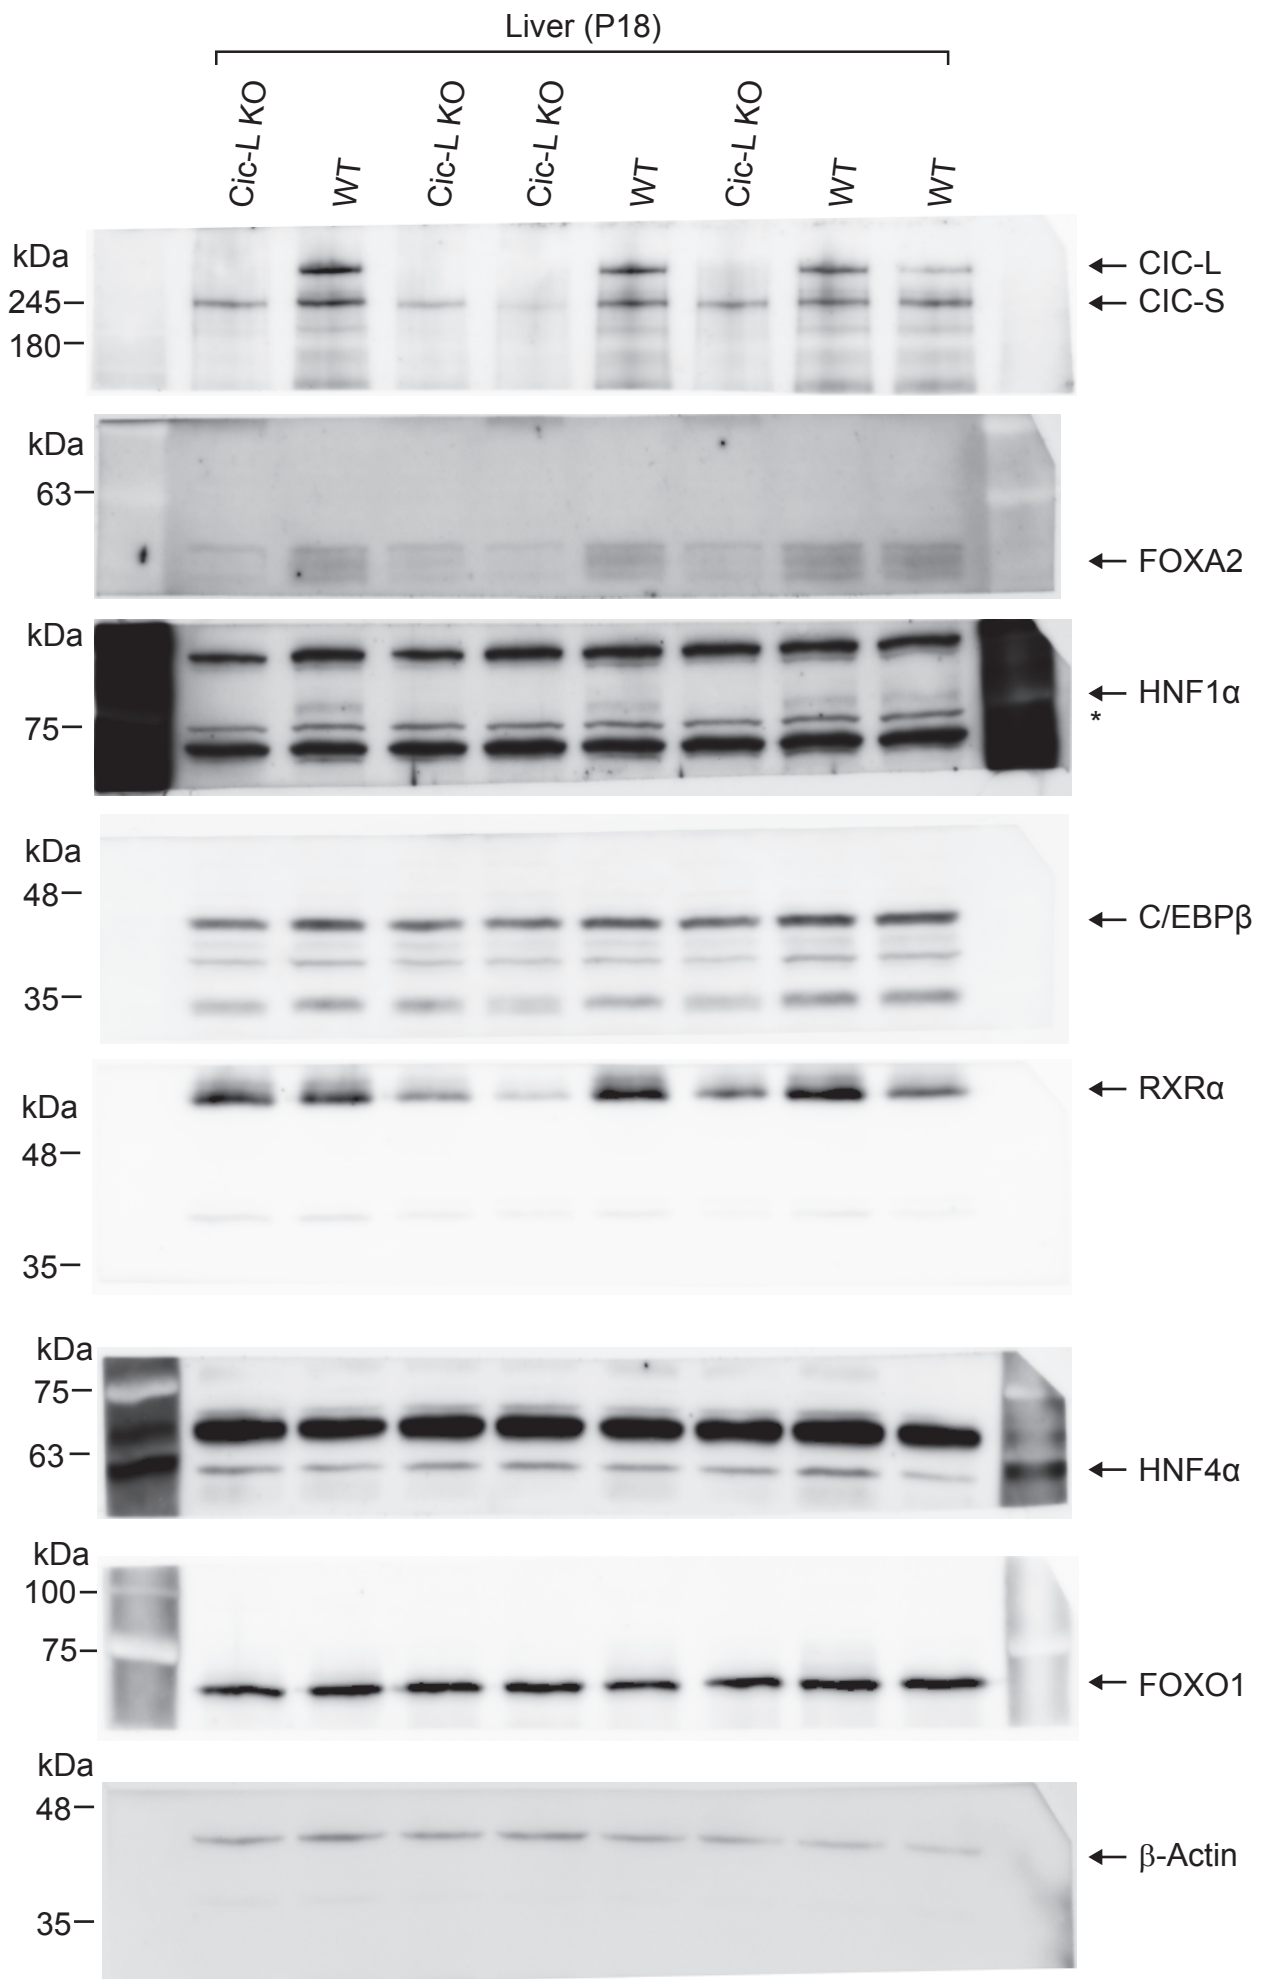

**Fig. S9. Unprocessed western blot images for Figure 4**

The western blot images were obtained using ImageQuant LAS 4000 (GE Healthcare Life Science).

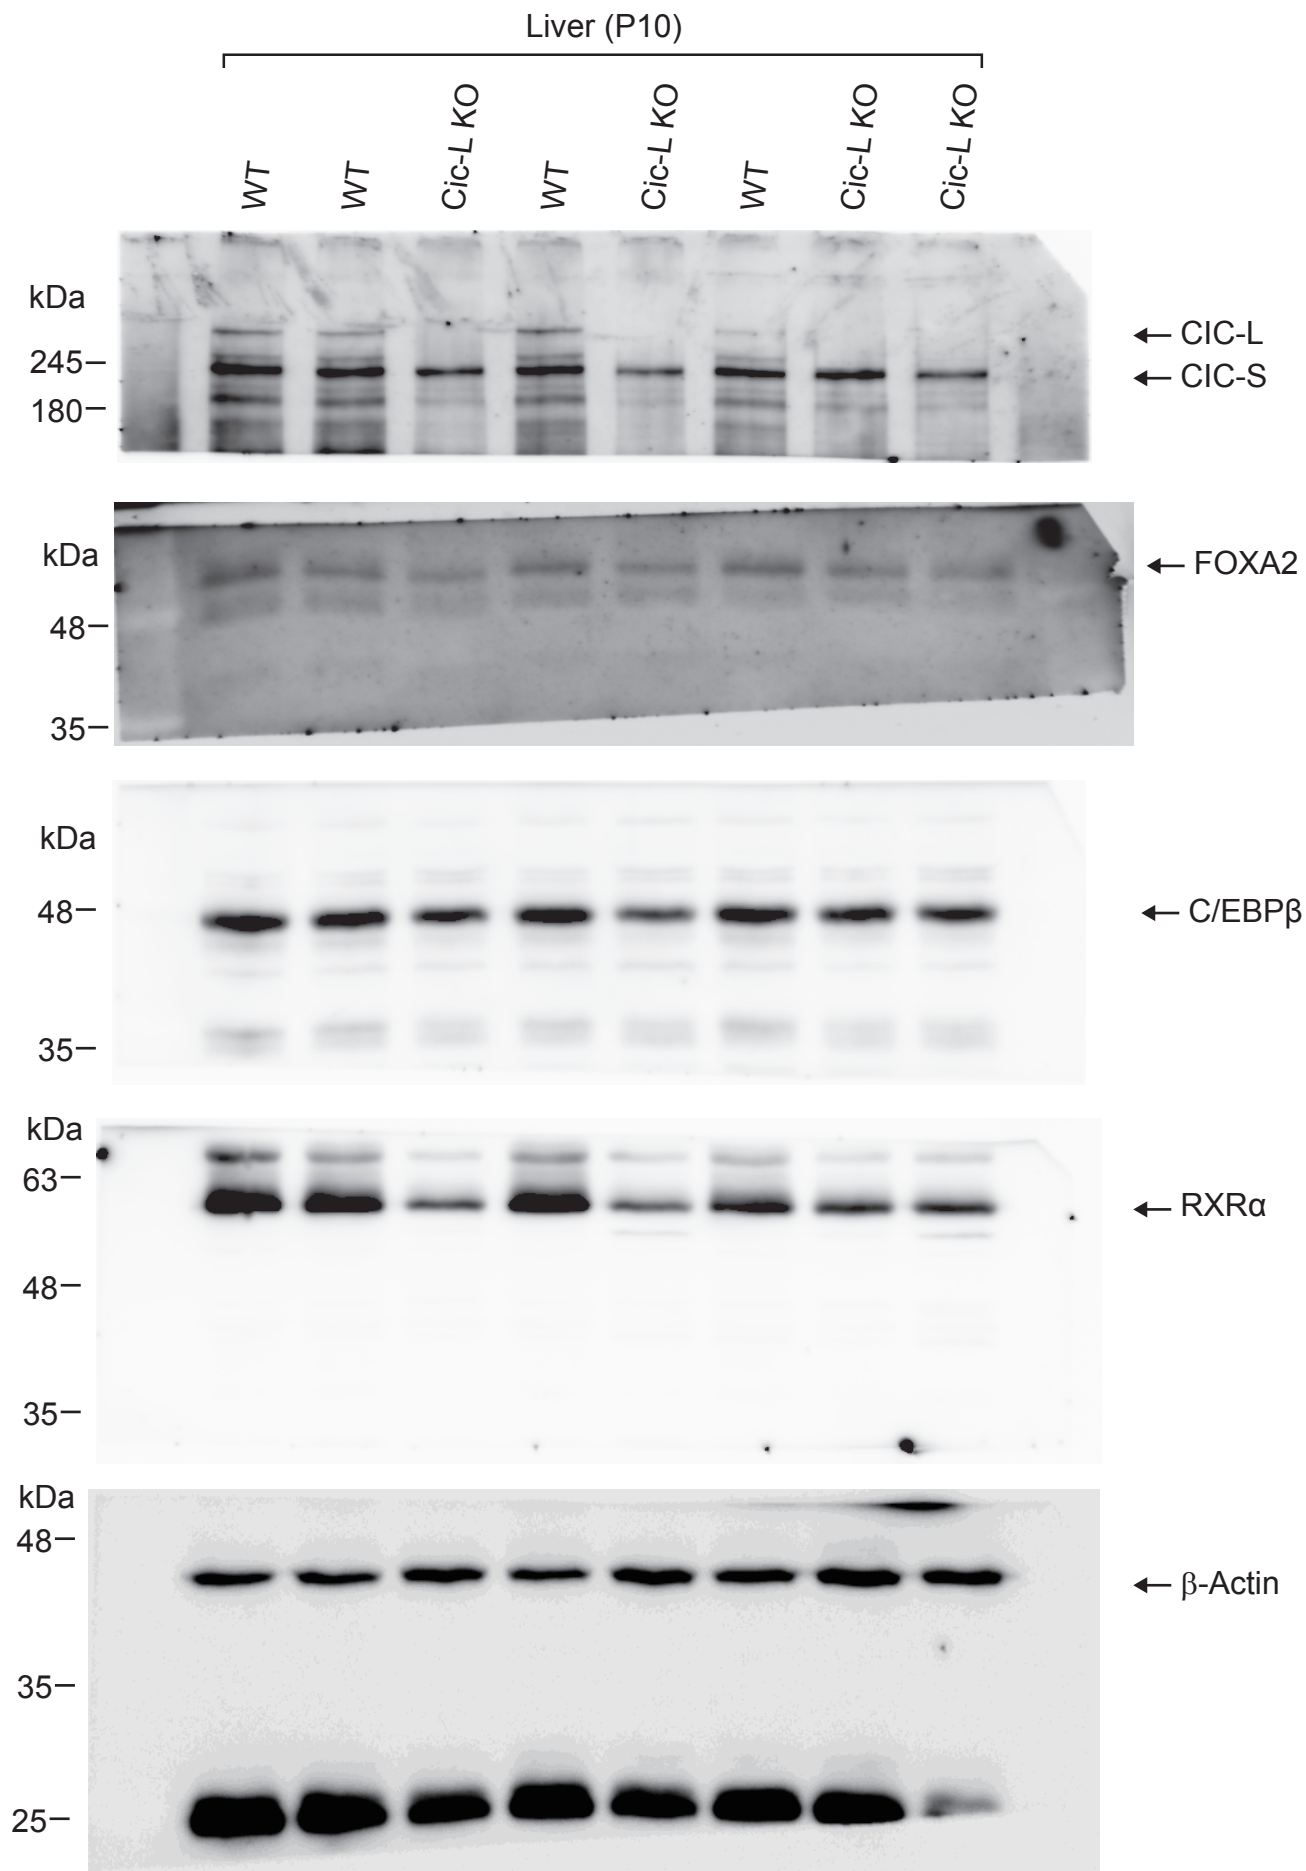

**Fig. S10. Unprocessed western blot images for Figure 5**

The western blot images were obtained using ImageQuant LAS 4000 (GE Healthcare Life Science).

**Table S1. The list of DEGs in liver of Cic-L KO mice at P18.**

| <b>EntrezID</b> | <b>Symbol</b> | <b>log2-Fold change(KO/WT)</b> | <b>P-value</b> |
|-----------------|---------------|--------------------------------|----------------|
| 13094           | Cyp2b9        | -5.35159353                    | 5.31E-10       |
| 243881          | Cyp2b23       | -2.867553588                   | 1.36E-09       |
| 13089           | Cyp2b13       | -4.013761539                   | 2.06E-09       |
| 17837           | Mug2          | -3.807150287                   | 2.98E-09       |
| 22359           | Vldlr         | 1.956292088                    | 5.04E-09       |
| 18113           | Nnmt          | -2.242423226                   | 3.29E-08       |
| 14262           | Fmo3          | -2.934028571                   | 3.82E-08       |
| 18212           | Ntrk2         | -1.919589564                   | 4.01E-08       |
| 434083          | Mug4          | -2.981337528                   | 4.45E-08       |
| 11813           | Apoc2         | -1.96573123                    | 5.56E-08       |
| 13107           | Cyp2f2        | -3.179891635                   | 5.63E-08       |
| 171281          | Acot3         | 2.416869064                    | 6.28E-08       |
| 12577           | Cdkn1c        | 1.622199205                    | 8.27E-08       |
| 110959          | Nudt19        | 1.293263545                    | 1.14E-07       |
| 16002           | Igf2          | 1.882493948                    | 1.20E-07       |
| 19079           | Prkab1        | 0.747136323                    | 1.93E-07       |
| 432720          | Akr1c19       | 1.41379507                     | 1.95E-07       |
| 12012           | Baat          | -1.386707446                   | 2.28E-07       |
| 17842           | Mup3          | -2.799980089                   | 2.31E-07       |
| 13009           | Csrp3         | -1.052793183                   | 3.08E-07       |
| 103988          | Gck           | -2.416064066                   | 3.19E-07       |
| 64385           | Cyp4f14       | -2.34790353                    | 3.20E-07       |
| 13119           | Cyp4a14       | 1.007499195                    | 3.39E-07       |
| 319476          | Lrtm1         | -2.403211176                   | 3.59E-07       |
| 319765          | Igf2bp2       | 0.666957138                    | 3.87E-07       |
| 13909           | EG13909       | -1.406009488                   | 3.93E-07       |
| 16008           | Igfbp2        | 1.939300629                    | 3.99E-07       |
| 20862           | Stfa2         | 1.500508254                    | 4.40E-07       |
| 331535          | Serpina7      | 1.876530789                    | 4.54E-07       |
| 11997           | Akr1b7        | 1.488773986                    | 5.12E-07       |
| 56741           | Nope          | 0.942113591                    | 5.27E-07       |
| 105349          | Akr1c18       | 1.986469202                    | 5.99E-07       |
| 12445           | Ccnd3         | 0.776927337                    | 6.58E-07       |
| 56508           | Rapgef4       | -0.9873712                     | 6.63E-07       |
| 20861           | Stfa1         | 1.532858135                    | 6.87E-07       |
| 66350           | Pla2g12a      | 0.714805284                    | 7.33E-07       |
| 68939           | Rasl11b       | 0.843826482                    | 7.40E-07       |
| 333182          | Cox6b2        | 1.221296419                    | 7.54E-07       |

|        |               |              |          |
|--------|---------------|--------------|----------|
| 22695  | Zfp36         | -0.853954351 | 7.62E-07 |
| 108682 | Gpt2          | -1.450054381 | 7.77E-07 |
| 107770 | Tm6sf2        | 0.826308057  | 8.14E-07 |
| 68728  | Trp53inp2     | -1.070417981 | 8.44E-07 |
| 13087  | Cyp2a5        | -1.315812843 | 8.66E-07 |
| 72361  | 2210023G05Rik | -0.693396701 | 9.86E-07 |
| 72027  | Slc39a4       | 0.875367401  | 1.00E-06 |
| 23882  | Gadd45g       | -1.713252162 | 1.03E-06 |
| 12070  | Ngfrap1       | 0.802115118  | 1.03E-06 |
| 17840  | Mup1          | -0.894175311 | 1.04E-06 |
| 20342  | Selenbp2      | -1.633144231 | 1.09E-06 |
| 12700  | Cish          | -2.077501782 | 1.13E-06 |
| 13649  | Egfr          | -1.002526407 | 1.25E-06 |
| 12709  | Ckb           | 0.733272346  | 1.27E-06 |
| 227693 | Zer1          | 0.875093891  | 1.34E-06 |
| 15374  | Hn1           | 0.612440454  | 1.49E-06 |
| 19125  | Prodh         | -1.855641256 | 1.87E-06 |
| 433016 | EG433016      | 1.07159697   | 2.06E-06 |
| 107375 | Slc25a45      | -0.767042209 | 2.11E-06 |
| 14955  | H19           | 0.820448706  | 2.16E-06 |
| 29869  | Ulk2          | -0.823911984 | 2.24E-06 |
| 15375  | Foxa1         | -0.887554234 | 2.41E-06 |
| 67893  | Tmem86a       | 0.906542015  | 2.47E-06 |
| 13370  | Dio1          | -0.963913577 | 2.54E-06 |
| 20440  | St6gal1       | 0.98827576   | 2.54E-06 |
| 22433  | Xbp1          | -0.762558408 | 2.63E-06 |
| 67528  | Nudt7         | -1.122148306 | 2.73E-06 |
| 66078  | Tsen34        | 0.87882804   | 2.81E-06 |
| 16319  | Incenp        | 0.528078276  | 2.94E-06 |
| 1E+08  | LOC100046232  | -0.589164469 | 2.96E-06 |
| 72040  | Mupcdh        | -1.005311212 | 3.05E-06 |
| 67442  | Retsat        | 0.845257367  | 3.17E-06 |
| 13108  | Cyp2g1        | -0.52452326  | 3.23E-06 |
| 11814  | Apoc3         | -1.131935401 | 3.29E-06 |
| 101488 | Slco2b1       | -1.102632585 | 3.32E-06 |
| 1E+08  | Dnajc3        | -0.704280505 | 3.51E-06 |
| 100637 | B230342M21Rik | -0.723125214 | 3.76E-06 |
| 72278  | Ccpg1         | -1.722289245 | 3.91E-06 |
| 14245  | Lpin1         | -1.260716454 | 3.97E-06 |
| 53897  | Gal3st1       | 0.6219085    | 4.01E-06 |
| 28194  | Apon          | -1.162144592 | 4.05E-06 |

|        |              |              |          |
|--------|--------------|--------------|----------|
| 216440 | Os9          | -0.793405511 | 4.07E-06 |
| 16005  | Igfals       | -1.173432179 | 4.08E-06 |
| 21763  | Tex2         | -0.641430205 | 4.18E-06 |
| 21415  | Tcf3         | 0.470172428  | 4.43E-06 |
| 63828  | Fn3k         | -0.628116239 | 4.86E-06 |
| 14228  | Fkbp4        | -1.055716566 | 4.87E-06 |
| 110855 | Pde6c        | 1.100843181  | 4.89E-06 |
| 19240  | Tmsb10       | 0.953781839  | 5.17E-06 |
| 11690  | Alox5ap      | 0.74861558   | 5.28E-06 |
| 94179  | Krt23        | 0.794191063  | 5.40E-06 |
| 16000  | Igf1         | -0.961568427 | 5.54E-06 |
| 17992  | Ndufa4       | -0.761337672 | 5.60E-06 |
| 14528  | Gch1         | -0.661889732 | 5.63E-06 |
| 12368  | Casp6        | 0.982383358  | 5.69E-06 |
| 14071  | F9           | -0.509926638 | 5.89E-06 |
| 20202  | S100a9       | 0.870778664  | 5.96E-06 |
| 17841  | Mup2         | -0.931016981 | 6.08E-06 |
| 11854  | Rhod         | 0.519697777  | 6.19E-06 |
| 12279  | C9           | -1.097218111 | 6.28E-06 |
| 1E+08  | LOC100048613 | 0.513216744  | 6.60E-06 |
| 75600  | Calml4       | 0.672603611  | 6.67E-06 |
| 13122  | Cyp7a1       | -2.111278953 | 6.68E-06 |
| 21664  | Phlda1       | -1.753173761 | 6.76E-06 |
| 18574  | Pde1b        | 0.58197213   | 7.02E-06 |
| 26932  | Ppp2r5e      | -0.699757196 | 7.05E-06 |
| 76282  | Gpt1         | -1.321023169 | 7.45E-06 |
| 14863  | Gstm2        | -1.037649276 | 7.56E-06 |
| 23986  | Peci         | 1.076330523  | 7.58E-06 |
| 11576  | Afp          | 2.135277464  | 7.89E-06 |
| 64697  | Keg1         | -0.841057423 | 7.94E-06 |
| 69065  | Chac1        | -1.406518598 | 8.02E-06 |
| 74053  | Grip1        | 0.469724506  | 8.03E-06 |
| 11668  | Aldh1a1      | -1.10309199  | 8.15E-06 |
| 12444  | Ccnd2        | 0.53143448   | 8.71E-06 |
| 231670 | Fbxo21       | 0.764849385  | 8.86E-06 |
| 66131  | Tipin        | 0.687939228  | 8.98E-06 |
| 14635  | Galk1        | 0.843724752  | 8.99E-06 |
| 76574  | Mfsd2        | -1.117392525 | 9.07E-06 |
| 58805  | Mlxipl       | -0.9585543   | 9.22E-06 |
| 70237  | Bhlhb9       | 0.566682684  | 9.68E-06 |
| 18483  | Palm         | 0.478174876  | 9.71E-06 |

|        |               |              |          |
|--------|---------------|--------------|----------|
| 57436  | Gabarap1      | -0.616704103 | 9.80E-06 |
| 13170  | Dbp           | 0.90255058   | 1.00E-05 |
| 140488 | Igf2bp3       | 0.714656625  | 1.02E-05 |
| 20393  | Sgk1          | 1.010582671  | 1.03E-05 |
| 233016 | Blvrb         | 0.945315122  | 1.15E-05 |
| 64075  | Smoc1         | -0.432170268 | 1.16E-05 |
| 15220  | Foxq1         | -1.76434661  | 1.17E-05 |
| 223775 | Pim3          | -0.630569294 | 1.22E-05 |
| 69169  | Faim3         | 0.850928895  | 1.23E-05 |
| 67475  | Ero1lb        | -0.746183224 | 1.23E-05 |
| 66664  | Tmem41a       | 0.4830539    | 1.25E-05 |
| 213393 | 8430408G22Rik | 0.947199004  | 1.27E-05 |
| 17237  | Mgrn1         | 0.50399404   | 1.27E-05 |
| 11799  | Birc5         | 0.769467688  | 1.34E-05 |
| 14412  | Slc6a13       | -0.530285148 | 1.35E-05 |
| 1E+08  | LOC100048480  | 0.867112339  | 1.36E-05 |
| 319171 | Hist1h2ao     | 0.789550857  | 1.39E-05 |
| 56175  | Bace2         | 0.463164789  | 1.39E-05 |
| 243382 | Ppm1k         | 0.693233514  | 1.40E-05 |
| 14664  | Slc6a9        | -0.60385695  | 1.40E-05 |
| 16691  | Krt8          | 0.603852198  | 1.43E-05 |
| 12795  | Plk3          | -1.025166393 | 1.43E-05 |
| 67760  | Slc38a2       | -0.976383097 | 1.47E-05 |
| 104174 | Gldc          | -0.565025421 | 1.49E-05 |
| 70789  | Kynu          | -0.735073166 | 1.53E-05 |
| 63986  | Gmfg          | 0.620687079  | 1.56E-05 |
| 16363  | Irf2          | -0.553589341 | 1.57E-05 |
| 22129  | Ttc3          | 0.546650805  | 1.57E-05 |
| 67759  | 5033414D02Rik | 0.650855061  | 1.61E-05 |
| 19299  | Abcd3         | -0.772318985 | 1.64E-05 |
| 381246 | Xkr9          | -0.728926909 | 1.67E-05 |
| 52829  | D4Bwg0951e    | -0.614326527 | 1.68E-05 |
| 14756  | Gpld1         | -0.549006792 | 1.69E-05 |
| 235493 | BC031353      | -0.998710997 | 1.69E-05 |
| 11529  | Adh7          | -0.596787648 | 1.70E-05 |
| 52589  | Ncald         | 0.645785181  | 1.76E-05 |
| 19261  | Sirpa         | 0.789514697  | 1.78E-05 |
| 76971  | 2810007J24Rik | -0.980304272 | 1.79E-05 |
| 546015 | LOC546015     | 0.617460788  | 1.79E-05 |
| 107435 | Hat1          | 0.595861644  | 1.79E-05 |
| 18045  | Nfyb          | 0.511721655  | 1.83E-05 |

|        |              |              |          |
|--------|--------------|--------------|----------|
| 15483  | Hsd11b1      | 0.517012196  | 1.86E-05 |
| 56473  | Fads2        | 0.825179625  | 1.88E-05 |
| 52815  | Ldhd         | -0.458470727 | 1.88E-05 |
| 66116  | Cml1         | -1.253337817 | 1.90E-05 |
| 27219  | Sgk2         | 0.636866742  | 1.91E-05 |
| 1E+08  | LOC100043257 | 0.849185358  | 1.93E-05 |
| 11611  | Agxt         | 0.43658412   | 1.93E-05 |
| 56459  | Sae1         | 0.879440288  | 1.96E-05 |
| 19653  | Rbm4         | -0.474392585 | 1.96E-05 |
| 13046  | Cugbp1       | -0.794193104 | 1.97E-05 |
| 103140 | Gstt3        | -1.392011963 | 1.98E-05 |
| 11639  | Ak311        | 0.782389865  | 2.02E-05 |
| 110323 | Cox6b1       | 0.518778774  | 2.06E-05 |
| 66522  | Pgpep1       | 0.529502363  | 2.10E-05 |
| 110382 | C8b          | -0.701914789 | 2.12E-05 |
| 73723  | Sh3bgr13     | 0.774525     | 2.25E-05 |
| 27362  | Dnajb9       | -0.608315909 | 2.29E-05 |
| 27360  | Add3         | 0.622945099  | 2.33E-05 |
| 15902  | Id2          | 0.550996981  | 2.36E-05 |
| 59083  | Fetub        | -0.675762925 | 2.41E-05 |
| 21877  | Tk1          | 0.760955368  | 2.46E-05 |
| 213391 | Rassf4       | 0.616964402  | 2.49E-05 |
| 14469  | Gbp2         | 0.790124359  | 2.55E-05 |
| 20621  | Snn          | 0.672339396  | 2.55E-05 |
| 11671  | Aldh3a2      | 0.579635281  | 2.55E-05 |
| 12515  | Cd69         | 0.46090678   | 2.60E-05 |
| 69083  | Sult1c2      | 0.722606581  | 2.63E-05 |
| 242785 | Klhl21       | -0.6555994   | 2.65E-05 |
| 12443  | Ccnd1        | 0.581165099  | 2.69E-05 |
| 209186 | Acnat2       | -0.72417695  | 2.74E-05 |
| 13088  | Cyp2b10      | -0.838636271 | 2.76E-05 |
| 11857  | Arhgdib      | 1.026065305  | 2.84E-05 |
| 17002  | Ltf          | 0.615683665  | 2.89E-05 |
| 218103 | Slc17a2      | 0.442845096  | 2.89E-05 |
| 23831  | Car14        | -0.676022509 | 2.98E-05 |
| 30045  | Dnajc12      | 0.956688512  | 3.00E-05 |
| 76263  | Gstk1        | -0.550784154 | 3.00E-05 |
| 71819  | Kif23        | 0.525059311  | 3.06E-05 |
| 27053  | Asns         | 1.041375478  | 3.09E-05 |
| 66427  | Cyb5b        | -0.588807514 | 3.09E-05 |
| 66990  | Tmem134      | 0.500631018  | 3.10E-05 |



|        |               |              |          |
|--------|---------------|--------------|----------|
| 214597 | Sidt2         | -0.456766307 | 3.11E-05 |
| 12908  | Crat          | 0.504750487  | 3.24E-05 |
| 14127  | Fcer1g        | 0.690321174  | 3.26E-05 |
| 14711  | Gnmt          | -0.579844117 | 3.31E-05 |
| 66530  | Ubxn6         | -0.509495017 | 3.33E-05 |
| 93673  | Cml2          | -0.793391657 | 3.35E-05 |
| 20230  | Satb1         | 0.597726159  | 3.39E-05 |
| 68591  | Mocos         | -0.746025838 | 3.41E-05 |
| 171207 | Arhgap4       | 0.548267151  | 3.57E-05 |
| 74032  | 4632417N05Rik | -0.77953975  | 3.57E-05 |
| 16906  | Lmnb1         | 0.627340365  | 3.65E-05 |
| 68196  | Hsbp1         | 0.769906141  | 3.67E-05 |
| 12512  | Cd63          | 0.60155881   | 3.68E-05 |
| 16168  | Il15          | 0.63198671   | 3.69E-05 |
| 22637  | Zap70         | -0.442819107 | 3.71E-05 |
| 16601  | Klf9          | -0.83879364  | 3.73E-05 |
| 243537 | Uroc1         | 0.753357495  | 3.80E-05 |
| 1E+08  | LOC100046802  | 0.710507608  | 4.01E-05 |
| 72972  | Gcap14        | 0.433353769  | 4.03E-05 |
| 66442  | Spc25         | 0.625004758  | 4.14E-05 |
| 17219  | Mcm6          | 0.536167566  | 4.16E-05 |
| 15937  | Ier3          | 0.521139267  | 4.17E-05 |
| 97998  | Depdc6        | -0.809298952 | 4.30E-05 |
| 13449  | Dok2          | 0.513083381  | 4.39E-05 |
| 229681 | Stf1          | -0.491392059 | 4.42E-05 |
| 67245  | Peli1         | -0.48377206  | 4.54E-05 |
| 104086 | Cyp27a1       | -0.873725462 | 4.55E-05 |
| 22381  | Wbp5          | 0.439353607  | 4.57E-05 |
| 226105 | Cyp2c70       | -0.748674065 | 4.57E-05 |
| 19116  | Prlr          | -1.557350072 | 4.68E-05 |
| 11461  | Actb          | 0.585313592  | 4.72E-05 |
| 19141  | Lgmn          | 1.122455174  | 4.74E-05 |
| 74761  | Mxra8         | 0.484240778  | 4.80E-05 |
| 17217  | Mcm4          | 0.615608427  | 4.85E-05 |
| 83814  | Nedd4l        | -0.524621089 | 4.87E-05 |
| 12069  | Bex2          | 0.539963395  | 4.99E-05 |
| 14792  | Lpcat3        | 0.71676978   | 5.01E-05 |
| 233406 | Prc1          | 0.748552192  | 5.07E-05 |
| 223646 | Naprt1        | 0.512751276  | 5.09E-05 |
| 12411  | Cbs           | -0.488046772 | 5.13E-05 |
| 66438  | Hamp2         | -1.941838967 | 5.18E-05 |

|        |                    |              |          |
|--------|--------------------|--------------|----------|
| 103655 | Sec14l4            | -0.590352635 | 5.20E-05 |
| 217707 | Coq6               | 0.583085384  | 5.27E-05 |
| 13733  | Emr1               | 1.232198158  | 5.29E-05 |
| 110196 | Fdps               | -0.788014248 | 5.32E-05 |
| 229905 | Ccbl2              | 1.007064641  | 5.38E-05 |
| 28250  | Slco1a4            | -0.572543186 | 5.43E-05 |
| 246256 | Fcgr4              | 0.476152921  | 5.49E-05 |
| 12696  | Cirbp              | 0.67741828   | 5.58E-05 |
| 12608  | Cebpb              | -0.706952324 | 5.59E-05 |
| 16668  | Krt18              | 0.583967695  | 5.61E-05 |
| 15242  | Hhex               | -0.795053569 | 5.73E-05 |
| 53313  | Atp2a3             | 0.593794431  | 5.75E-05 |
| 60525  | Acss2              | -0.482495916 | 5.76E-05 |
| 26362  | Axl                | 0.653672342  | 5.87E-05 |
| 54139  | Irf6               | -0.849790134 | 5.90E-05 |
| 12125  | Bcl2l1             | 0.578072304  | 5.90E-05 |
| 67711  | Nsmce1             | 0.467831894  | 5.91E-05 |
| 18383  | Tnfrsf11b          | 0.706325867  | 5.99E-05 |
| 14873  | Gsto1              | -0.591556681 | 6.04E-05 |
| 14605  | Tsc22d3            | -1.029527048 | 6.07E-05 |
| 620807 | 620807             | -0.451276494 | 6.10E-05 |
| 12262  | C1qc               | 0.956259615  | 6.34E-05 |
| 16149  | Cd74               | 1.063811092  | 6.34E-05 |
| 15170  | Ptpn6              | 0.568399002  | 6.36E-05 |
| 20568  | Slpi               | 0.667912615  | 6.55E-05 |
| 68177  | Ebpl               | 0.72329497   | 6.60E-05 |
| 677289 | ENSMUSG00000043795 | 0.601817205  | 6.72E-05 |
| 68743  | Anln               | 0.634167099  | 6.76E-05 |
| 94219  | Cnnm2              | -0.506553331 | 6.78E-05 |
| 13074  | Cyp17a1            | -0.703524749 | 6.82E-05 |
| 55938  | Apom               | 0.892544238  | 6.84E-05 |
| 13057  | Cyba               | 0.716627068  | 6.85E-05 |
| 56807  | Scamp5             | 0.472652603  | 6.90E-05 |
| 68352  | 0610012D14Rik      | -0.727402097 | 7.00E-05 |
| 231507 | Plac8              | 0.671264822  | 7.19E-05 |
| 20303  | Ccl4               | 0.525587464  | 7.20E-05 |
| 116914 | Slc19a2            | 0.714558205  | 7.34E-05 |
| 67878  | Tmem33             | -0.537448087 | 7.44E-05 |
| 19718  | Rfc2               | 0.625304915  | 7.47E-05 |
| 108995 | Tbc1d10c           | 0.569386879  | 7.53E-05 |
| 12721  | Coro1a             | 0.738241961  | 7.73E-05 |

|        |               |              |           |
|--------|---------------|--------------|-----------|
| 641240 | LOC641240     | 0.864299053  | 7.80E-05  |
| 12457  | Ccrn4l        | -0.638300743 | 7.99E-05  |
| 103149 | Upb1          | 0.457395477  | 8.09E-05  |
| 217721 | Mfsd7c        | 0.584217321  | 8.10E-05  |
| 74186  | Ccdc3         | 0.456373702  | 8.13E-05  |
| 320405 | Cadps2        | -0.571240341 | 8.28E-05  |
| 12505  | Cd44          | 0.457721119  | 8.32E-05  |
| 19252  | Dusp1         | -1.003308256 | 8.51E-05  |
| 21835  | Thrsp         | -0.679763647 | 8.55E-05  |
| 319173 | Hist1h2af     | 0.53684064   | 8.74E-05  |
| 16792  | Laptm5        | 0.789564707  | 8.76E-05  |
| 13124  | Cyp8b1        | -0.825461237 | 8.84E-05  |
| 72657  | 2700094K13Rik | 0.609057355  | 9.10E-05  |
| 23833  | Cd52          | 0.676752865  | 9.31E-05  |
| 101602 | AI467606      | 0.523975708  | 9.32E-05  |
| 76933  | Ifi27         | 0.815209898  | 9.35E-05  |
| 22172  | Tyms-ps       | 0.603054669  | 9.67E-05  |
| 114301 | Palmd         | 0.451393573  | 0.0001009 |
| 71375  | Foxn3         | -0.47744807  | 0.0001022 |
| 100689 | Spon2         | 0.548100206  | 0.0001026 |
| 67064  | Chmp1b        | -0.46870149  | 0.0001028 |
| 20454  | St3gal5       | -0.521763608 | 0.0001033 |
| 76267  | Fads1         | 0.506188377  | 0.000104  |
| 11522  | Adh1          | -0.596539418 | 0.0001061 |
| 13048  | Cux2          | 1.181224845  | 0.0001064 |
| 56878  | Rbms1         | 0.629856758  | 0.0001072 |
| 20384  | Sfrs5         | 0.998253031  | 0.0001087 |
| 22418  | Wnt5a         | 0.428113448  | 0.0001096 |
| 226418 | Yod1          | -0.700969306 | 0.0001105 |
| 18817  | Plk1          | 0.556748443  | 0.0001117 |
| 233575 | Frag1         | 0.515797212  | 0.0001122 |
| 14600  | Ghr           | -0.572169948 | 0.0001125 |
| 232493 | Gys2          | 0.725574999  | 0.0001126 |
| 14232  | Fkbp8         | -0.512089339 | 0.0001153 |
| 77889  | Lbh           | 0.47641329   | 0.0001165 |
| 12338  | Capn6         | 0.487461462  | 0.0001166 |
| 12452  | Ccng2         | -0.728975197 | 0.0001171 |
| 16541  | Napsa         | 0.455487257  | 0.0001195 |
| 14678  | Gnai2         | 0.521426503  | 0.0001201 |
| 18718  | Pip4k2a       | 0.43209028   | 0.0001221 |
| 224045 | Eif2b5        | -0.445958012 | 0.0001223 |

|        |               |              |           |
|--------|---------------|--------------|-----------|
| 207818 | BC004728      | -0.502042512 | 0.0001224 |
| 74155  | Errfi1        | -0.78055217  | 0.000123  |
| 11655  | Alas1         | -0.955305876 | 0.0001254 |
| 105855 | Nckap11       | 0.461965198  | 0.0001266 |
| 70266  | Ccbl1         | -0.639913651 | 0.0001281 |
| 14229  | Fkbp5         | -0.428111105 | 0.0001282 |
| 18636  | Cfp           | 0.58721647   | 0.0001286 |
| 26897  | Acot1         | 0.794041105  | 0.0001293 |
| 83669  | Wdr6          | 0.448017839  | 0.0001304 |
| 67235  | Zkscan14      | -0.50270938  | 0.0001331 |
| 84112  | Sucnr1        | -0.54043829  | 0.0001338 |
| 230991 | B930041F14Rik | 0.523703595  | 0.0001353 |
| 21826  | Thbs2         | 0.569126654  | 0.0001361 |
| 228769 | Psmf1         | 0.437242749  | 0.0001371 |
| 106582 | Nrm           | 0.485317286  | 0.0001373 |
| 54711  | Plagl2        | 0.475135241  | 0.0001373 |
| 231801 | Agfg2         | 0.479105854  | 0.0001387 |
| 56695  | Pnkd          | -0.593593131 | 0.0001388 |
| 110033 | Kif22         | 0.482430661  | 0.0001416 |
| 52150  | Kcnk6         | 0.45297374   | 0.0001426 |
| 14961  | H2-Ab1        | 0.83687407   | 0.0001434 |
| 74126  | Syvn1         | -0.561160749 | 0.000146  |
| 13167  | Dbi           | 0.5740559    | 0.0001471 |
| 52033  | Pbk           | 0.850877091  | 0.0001481 |
| 69008  | Cab39l        | -0.581520057 | 0.0001488 |
| 245688 | Rbbp7         | 0.703394791  | 0.0001503 |
| 17434  | Mocs2         | 0.487785521  | 0.0001504 |
| 21912  | Tspan7        | 0.508287511  | 0.0001518 |
| 227929 | Cytip         | 0.673144819  | 0.0001519 |
| 79059  | Nme3          | -0.491098275 | 0.0001524 |
| 217732 | 2310044G17Rik | -0.559200699 | 0.000153  |
| 16855  | Lgals4        | 0.516927358  | 0.0001533 |
| 20193  | S100a1        | -0.529042851 | 0.000154  |
| 20970  | Sdc3          | 0.623655637  | 0.0001543 |
| 19682  | Rdh5          | 0.463982663  | 0.0001551 |
| 225341 | Lims2         | -0.44629879  | 0.000157  |
| 52639  | Wipi1         | -0.540780163 | 0.0001574 |
| 13007  | Csrp1         | 0.462621864  | 0.0001589 |
| 66938  | 1700029G01Rik | 0.449549693  | 0.0001667 |
| 319176 | Hist2h2ac     | 0.443201495  | 0.0001673 |
| 19049  | Ppp1r1b       | 0.573300521  | 0.0001677 |

|        |               |              |           |
|--------|---------------|--------------|-----------|
| 192197 | Bcas3         | -0.731087246 | 0.000168  |
| 50500  | Ttpa          | -0.457919577 | 0.0001718 |
| 20201  | S100a8        | 0.604743225  | 0.000172  |
| 66885  | Acadsb        | -0.666816366 | 0.0001734 |
| 240549 | EG240549      | 0.457540179  | 0.0001748 |
| 12317  | Calr          | -0.684879483 | 0.000176  |
| 14734  | Gpc3          | 0.585588486  | 0.0001797 |
| 16854  | Lgals3        | 0.885465985  | 0.0001798 |
| 22171  | Tyms          | 0.528782426  | 0.0001806 |
| 67738  | Ppid          | -0.544528149 | 0.0001816 |
| 67163  | Ccdc47        | -0.518723883 | 0.0001825 |
| 17167  | Marco         | 1.336349193  | 0.0001828 |
| 66411  | Tbcb          | 0.561062592  | 0.000184  |
| 74191  | P2ry13        | 0.70135508   | 0.000187  |
| 213550 | Dis3l         | -0.578421008 | 0.0001878 |
| 14289  | Fpr2          | 0.854182844  | 0.0001883 |
| 21939  | Cd40          | 0.541736929  | 0.0001912 |
| 70564  | 5730469M10Rik | 0.583130038  | 0.0001914 |
| 246277 | Csad          | 0.60205117   | 0.0001927 |
| 11841  | Arf2          | 0.542640652  | 0.0001967 |
| 23959  | Nt5e          | -0.581844097 | 0.0001969 |
| 66039  | D14Ert449e    | -0.549464815 | 0.0001981 |
| 16145  | Igtp          | 0.537347466  | 0.0002032 |
| 24108  | Ubd           | 0.452025893  | 0.0002037 |
| 27413  | Abcb11        | -0.44112266  | 0.000207  |
| 56744  | Cxcl4         | 0.54216019   | 0.0002096 |
| 70024  | Mcm10         | -0.765395747 | 0.00021   |
| 13849  | Ephx1         | -0.5126001   | 0.0002123 |
| 68337  | Crip2         | 0.558953342  | 0.0002128 |
| 654426 | LOC654426     | 0.469153297  | 0.0002248 |
| 14261  | Fmo1          | -0.644517771 | 0.0002281 |
| 71833  | Wdr68         | 0.441021859  | 0.0002288 |
| 14998  | H2-DMa        | 0.643263895  | 0.0002323 |
| 20195  | S100a11       | 0.428889191  | 0.0002338 |
| 80884  | Maged2        | 0.573701483  | 0.000235  |
| 53902  | Rcan3         | 0.457848763  | 0.000237  |
| 76184  | Abca6         | -0.692930557 | 0.0002419 |
| 110095 | Pygl          | -0.536170147 | 0.0002428 |
| 56868  | Psg23         | -0.655944055 | 0.0002435 |
| 232334 | Vgll4         | -0.554250954 | 0.0002505 |
| 18946  | Pnliprp1      | 0.837958919  | 0.0002521 |

|        |          |              |           |
|--------|----------|--------------|-----------|
| 50905  | Il17rb   | 0.576918521  | 0.0002556 |
| 210973 | Kbtbd2   | -0.464055117 | 0.0002578 |
| 227231 | Cps1     | -0.485036553 | 0.0002613 |
| 52670  | Cpsf4l   | -0.490278937 | 0.000262  |
| 12306  | Anxa2    | 0.772432676  | 0.0002627 |
| 18405  | Orm1     | -1.12292007  | 0.0002656 |
| 60596  | Gucy1a3  | 0.47086201   | 0.0002663 |
| 54396  | Iigp2    | 0.500713546  | 0.0002689 |
| 17195  | Mbl2     | -0.696543812 | 0.0002695 |
| 66270  | Fam134b  | -0.697248962 | 0.0002727 |
| 12615  | Cenpa    | 0.689218768  | 0.000274  |
| 20878  | Aurka    | 0.474836359  | 0.0002741 |
| 68777  | Tmem53   | 0.506342721  | 0.0002767 |
| 14314  | Fstl1    | 0.441496323  | 0.0002782 |
| 66234  | Sc4mol   | -0.49427578  | 0.0002805 |
| 76893  | Lass2    | -0.554595621 | 0.0002896 |
| 22628  | Ywhag    | -0.498870866 | 0.0002907 |
| 76846  | Rps9     | -0.502717644 | 0.0002989 |
| 13195  | Ddc      | -0.54880374  | 0.0002997 |
| 22352  | Vim      | 0.450000604  | 0.0003006 |
| 56150  | Mad2l1   | 0.700309628  | 0.0003017 |
| 15505  | Hsph1    | -0.456914121 | 0.0003056 |
| 545670 | Cyp4a31  | 0.534707414  | 0.0003059 |
| 231070 | Insig1   | 0.575380391  | 0.0003059 |
| 107766 | Hao      | -0.440968554 | 0.0003085 |
| 64209  | Herpud1  | -0.495299004 | 0.0003107 |
| 110172 | Slc35b1  | -0.668267416 | 0.0003115 |
| 117198 | Ivns1abp | -0.464558487 | 0.0003123 |
| 72084  | Pigx     | 0.468263798  | 0.0003129 |
| 69219  | Ddah1    | 0.464520539  | 0.0003189 |
| 17294  | Mest     | 0.464344942  | 0.0003215 |
| 74144  | Robo4    | 0.547540594  | 0.000324  |
| 20219  | Apcs     | 0.702461679  | 0.0003241 |
| 22139  | Tr       | 0.645807021  | 0.0003278 |
| 69786  | Tprkb    | -0.475265125 | 0.000328  |
| 21946  | Pglyrp1  | 0.509781503  | 0.0003287 |
| 18073  | Nid1     | 0.552860186  | 0.0003314 |
| 15926  | Idh1     | -0.677451079 | 0.000336  |
| 14710  | Gngt2    | 0.489111453  | 0.0003383 |
| 98878  | Ehd4     | 0.515218002  | 0.0003409 |
| 102294 | Cyp4v3   | -0.507581996 | 0.0003414 |

|        |               |              |           |
|--------|---------------|--------------|-----------|
| 69386  | Hist1h4h      | -0.447271217 | 0.0003432 |
| 320024 | Aadacl1       | 0.483760624  | 0.0003508 |
| 11732  | Ank           | -0.429538434 | 0.000358  |
| 18173  | Slc11a1       | 0.522339422  | 0.0003629 |
| 243085 | Ugt2b35       | -0.824135862 | 0.0003642 |
| 110454 | Ly6a          | 0.810808001  | 0.0003676 |
| 380712 | Tlcd2         | -0.515211607 | 0.0003702 |
| 12508  | Cd53          | 0.663045279  | 0.0003727 |
| 14871  | Gstt1         | -0.501277653 | 0.0003747 |
| 19074  | Prg2          | 0.631702424  | 0.0003773 |
| 14121  | Fbp1          | 1.028942804  | 0.0003826 |
| 71724  | Aox3          | -0.685538301 | 0.0003831 |
| 12260  | C1qb          | 0.926889409  | 0.0003832 |
| 11723  | Amy2          | -0.798780217 | 0.0003915 |
| 22146  | Tuba1c        | -0.958011523 | 0.0004001 |
| 12401  | Serpina6      | -0.514014079 | 0.0004043 |
| 114143 | Atp6v0b       | -0.463659574 | 0.0004057 |
| 28028  | Mrpl50        | 0.438243343  | 0.0004116 |
| 75541  | 1700019G17Rik | -0.685853051 | 0.0004136 |
| 68738  | Acss1         | 0.429369331  | 0.0004143 |
| 12916  | Crem          | -0.526445283 | 0.0004155 |
| 18616  | Peg3          | 0.495386     | 0.0004266 |
| 11861  | Arl4a         | 0.521916746  | 0.0004323 |
| 19369  | Raet1b        | 0.582492207  | 0.0004346 |
| 16362  | Irf1          | 0.45465556   | 0.0004358 |
| 65972  | Ifi30         | 0.501326432  | 0.0004361 |
| 18041  | Nfs1          | -0.427242161 | 0.0004378 |
| 69772  | Bdh2          | -0.455992748 | 0.0004404 |
| 330192 | Vps37b        | 0.43007268   | 0.0004422 |
| 1E+08  | LOC100040919  | 0.440241984  | 0.0004463 |
| 14827  | Pdia3         | -0.429362655 | 0.0004499 |
| 71699  | Slc41a3       | 0.569280317  | 0.0004551 |
| 100647 | Upk3b         | 0.540376817  | 0.0004557 |
| 66377  | Ndufc1        | 0.482875268  | 0.0004588 |
| 66866  | Nhlrc2        | 0.558905214  | 0.0004597 |
| 19419  | Rasgrp1       | 0.608214359  | 0.0004674 |
| 16592  | Fabp5         | 0.560625991  | 0.0004706 |
| 20352  | Sema4b        | 0.504745848  | 0.0004714 |
| 15331  | Hmgn2         | 0.515444583  | 0.0004714 |
| 114644 | Slc13a3       | 0.603989015  | 0.0004731 |
| 17118  | Marcks        | 0.526124586  | 0.0004897 |

|        |               |              |           |
|--------|---------------|--------------|-----------|
| 22156  | Tuft1         | -0.854126026 | 0.0004946 |
| 71782  | Ankle2        | -0.429377662 | 0.0005    |
| 11829  | Aqp4          | 0.459065625  | 0.0005018 |
| 56720  | Tdo2          | -0.663360503 | 0.0005037 |
| 19038  | Ppic          | 0.481138895  | 0.0005312 |
| 16402  | Itga5         | 0.435812085  | 0.0005341 |
| 17194  | Mbl1          | -0.494552582 | 0.0005462 |
| 230514 | Leprot        | 0.507927533  | 0.0005511 |
| 223697 | Unc84b        | 0.436994829  | 0.0005517 |
| 71910  | Ppapdc1b      | 0.592652845  | 0.0005539 |
| 110391 | Qdpr          | -0.602860816 | 0.0005661 |
| 17536  | Meis2         | 0.531697594  | 0.0005703 |
| 20422  | Shfm1         | 0.624263658  | 0.0005769 |
| 11905  | Serpinc1      | -0.579236242 | 0.000583  |
| 76737  | Creld2        | -0.600468623 | 0.000585  |
| 66875  | 1200016B10Rik | -0.518409779 | 0.0005965 |
| 67707  | Mrpl24        | -0.659682617 | 0.0006004 |
| 22256  | Ung           | 0.448815946  | 0.0006014 |
| 67554  | Slc25a30      | -0.782617754 | 0.0006077 |
| 19241  | Tmsb4x        | 0.633075918  | 0.0006087 |
| 72472  | Slc16a10      | -0.46850448  | 0.0006093 |
| 14870  | Gstp1         | 0.646309543  | 0.0006349 |
| 67398  | Srpr          | -0.529434468 | 0.0006374 |
| 15267  | Hist2h2aa1    | -0.542059608 | 0.000638  |
| 56876  | Nelf          | -0.801614064 | 0.0006471 |
| 106869 | Tnfaip8       | 0.494620243  | 0.0006485 |
| 78894  | Aacs          | -0.521534909 | 0.0006589 |
| 14312  | Brd2          | -0.616008619 | 0.0006625 |
| 66540  | 3110001A13Rik | -0.458768825 | 0.0006677 |
| 71670  | Acy3          | -0.473374092 | 0.0006714 |
| 56176  | Pigp          | 0.567761561  | 0.0006756 |
| 13823  | Epb4.113      | 0.465644496  | 0.0006825 |
| 76654  | Upp2          | -0.625341781 | 0.0007002 |
| 99237  | Tm9sf4        | -0.447407642 | 0.0007047 |
| 266781 | Snx17         | 0.489238081  | 0.0007116 |
| 108099 | Prkag2        | -0.617787622 | 0.0007134 |
| 56177  | Olfm1         | 0.439195207  | 0.0007161 |
| 22329  | Vcam1         | 0.567189005  | 0.000717  |
| 26900  | Ddx3y         | -0.493306535 | 0.000718  |
| 320806 | Gfm2          | -0.454721165 | 0.0007222 |
| 22592  | Ercc5         | -0.633179138 | 0.0007334 |



|        |               |              |           |
|--------|---------------|--------------|-----------|
| 14793  | Cdca3         | 0.442045394  | 0.0007362 |
| 20216  | Acsn3         | 0.508500216  | 0.0007552 |
| 109900 | Asl           | -0.513333045 | 0.0007562 |
| 171282 | Acot4         | 0.695954193  | 0.0007725 |
| 20133  | Rrm1          | 0.475624399  | 0.0007726 |
| 20692  | Sparc         | 0.43823957   | 0.0007733 |
| 232086 | Tmem150       | 0.437256529  | 0.0007765 |
| 68276  | Toe1          | 0.42748389   | 0.0007786 |
| 18631  | Pex11a        | -0.523169895 | 0.0007792 |
| 15481  | Hspa8         | -0.626643999 | 0.0007817 |
| 23821  | Bace1         | 0.599950842  | 0.0007885 |
| 29811  | Ndrp2         | -0.539687039 | 0.0008124 |
| 67072  | Cdc37l1       | -0.498235253 | 0.0008241 |
| 72042  | Cotl1         | 0.548658727  | 0.0008258 |
| 14969  | H2-Eb1        | 0.615139881  | 0.0008345 |
| 1E+08  | LOC100046918  | 0.604465552  | 0.0008371 |
| 107995 | Cdc20         | 0.514399293  | 0.000841  |
| 70556  | Slc25a33      | 0.628086837  | 0.0008441 |
| 12350  | Car3          | 0.593030652  | 0.000862  |
| 21672  | Prdx2         | 0.490209542  | 0.0008621 |
| 93694  | Clec2d        | -0.775877447 | 0.0008639 |
| 231532 | Arhgap24      | -0.43355657  | 0.0008676 |
| 67701  | Wfdc2         | -0.630855077 | 0.0008736 |
| 26358  | Aldh1a7       | -0.698333827 | 0.0008758 |
| 17084  | Ly86          | 0.472205932  | 0.0008804 |
| 21677  | Tead2         | 0.428460706  | 0.0008838 |
| 12575  | Cdkn1a        | -0.511983967 | 0.000886  |
| 13653  | Egr1          | -1.401970037 | 0.0008924 |
| 68465  | Adipor2       | -0.535657009 | 0.0008996 |
| 66917  | Chordc1       | -0.6154191   | 0.0009127 |
| 56200  | Ddx21         | -0.545179112 | 0.0009316 |
| 1E+08  | LOC100045567  | 0.498468526  | 0.0009525 |
| 210808 | 9030625A04Rik | 0.509941759  | 0.0009598 |
| 12362  | Casp1         | 0.570148399  | 0.0009836 |
| 15216  | Hfe           | 0.536066619  | 0.000995  |
| 239743 | Klhl6         | 0.509245985  | 0.0009993 |
| 18302  | Oit3          | 0.567266807  | 0.001001  |
| 0      | 0             | 0.502615927  | 0.0010248 |
| 333331 | LOC333331     | 0.496369618  | 0.0010445 |
| 226519 | Lamc1         | 0.553623083  | 0.0010499 |
| 16439  | Itpr2         | -0.487489001 | 0.0010523 |

|        |                    |              |           |
|--------|--------------------|--------------|-----------|
| 215627 | Zbtb8b             | -0.517760612 | 0.001069  |
| 1E+08  | OTTMUSG00000000971 | 0.467022163  | 0.0010951 |
| 60599  | Trp53inp1          | -0.51557159  | 0.0010983 |
| 14287  | Fpgs               | -0.629140167 | 0.0011097 |
| 12738  | Cldn2              | -0.600825429 | 0.0011144 |
| 74764  | Klc4               | -0.432378626 | 0.0011232 |
| 53877  | Ear4               | 0.657520466  | 0.0011314 |
| 15081  | H3f3b              | 0.51636157   | 0.0011342 |
| 208171 | Tmprss7            | 0.430787153  | 0.0011501 |
| 56356  | Gltp               | 0.518962507  | 0.001151  |
| 56422  | Hbs1l              | 0.434582857  | 0.0011511 |
| 67892  | 1810063B05Rik      | 0.487611711  | 0.0011558 |
| 70425  | Csnk1g3            | -0.463362449 | 0.0011761 |
| 21885  | Tle1               | -0.482402662 | 0.0011796 |
| 66704  | Rbm4b              | -0.581175892 | 0.0011962 |
| 17533  | Mrc1               | 0.578153844  | 0.0011971 |
| 74007  | Btbd11             | 0.54770297   | 0.0012478 |
| 100763 | Ube3c              | -0.490595563 | 0.0012603 |
| 54353  | Skap2              | 0.562392805  | 0.0013233 |
| 70335  | Reep6              | -0.491619455 | 0.0013246 |
| 69981  | Tmem30a            | -0.482487757 | 0.0013624 |
| 18670  | Abcb4              | -0.457179751 | 0.0013727 |
| 20088  | Rps24              | 0.585596625  | 0.001375  |
| 14081  | Acs1l              | 0.619140612  | 0.0013819 |
| 56715  | Rabgef1            | -0.555496889 | 0.0013846 |
| 234875 | Ttc13              | -0.534660719 | 0.0013936 |
| 230558 | C8a                | -0.833316806 | 0.0014604 |
| 26364  | Cd97               | 0.539364397  | 0.0015133 |
| 17304  | Mfge8              | 0.455096046  | 0.0015198 |
| 99375  | Cul4a              | -0.43337233  | 0.0016209 |
| 209086 | Samd9l             | -0.530649639 | 0.0016407 |
| 18242  | Oat                | 0.593864256  | 0.0016473 |
| 225160 | Thoc1              | -0.451326284 | 0.0016477 |
| 217258 | Abca8a             | 0.59419322   | 0.0016624 |
| 26382  | Fgd2               | 0.469609328  | 0.0016752 |
| 252972 | Tpcn1              | -0.543168436 | 0.0016981 |
| 14533  | Bloc1s1            | 0.527257945  | 0.0017319 |
| 75613  | Med25              | 0.4304285    | 0.0017466 |
| 52430  | Echdc2             | 0.464601134  | 0.0017511 |
| 52040  | Ppp1r10            | -0.635418627 | 0.0017825 |
| 97484  | Cog8               | -0.440376278 | 0.0018023 |

|        |               |              |           |
|--------|---------------|--------------|-----------|
| 12753  | Clock         | -0.513586447 | 0.0018922 |
| 207781 | 5830404H04Rik | -0.476132872 | 0.0018963 |
| 109113 | Uhrf2         | -0.433143998 | 0.002009  |
| 104759 | Pld4          | 0.458133048  | 0.0020488 |
| 15439  | Hp            | 0.59636019   | 0.0020888 |
| 52468  | Ctdsp2        | 0.456260119  | 0.0020944 |
| 12739  | Cldn3         | 0.488425715  | 0.0021295 |
| 18845  | Plxna2        | -0.56759905  | 0.002157  |
| 69237  | Gtpbp4        | -0.440525764 | 0.0021911 |
| 17110  | Lyz           | 0.627022608  | 0.0021952 |
| 52830  | Pnrc2         | 0.494956353  | 0.0022403 |
| 238330 | 6430527G18Rik | -0.449131351 | 0.0022626 |
| 20491  | Sla           | 0.46010821   | 0.0022684 |
| 100715 | Papd4         | 0.427224422  | 0.0022888 |
| 56085  | Ubqln1        | -0.476823481 | 0.0023075 |
| 12527  | Cd9           | 0.504890627  | 0.0023274 |
| 71712  | 1200002N14Rik | 0.460400829  | 0.002336  |
| 245828 | Trappc1       | 0.462642272  | 0.0023429 |
| 16427  | Itih4         | 0.475459062  | 0.0023479 |
| 22376  | Was           | 0.627226475  | 0.0023789 |
| 12007  | Azgp1         | -0.737618544 | 0.0024271 |
| 236920 | Stard8        | 0.465336002  | 0.0024532 |
| 75292  | Prkd3         | -0.495352709 | 0.0024576 |
| 15139  | Hc            | 0.458341584  | 0.0026467 |
| 108907 | Nusap1        | 0.472650584  | 0.0026575 |
| 71911  | Bdh1          | 0.493997024  | 0.0027147 |
| 66925  | Sdhd          | -0.441411859 | 0.002719  |
| 50762  | Fbxo6         | -0.469102611 | 0.00273   |
| 68349  | Ndufs3        | 0.502487619  | 0.002744  |
| 13112  | Cyp3a11       | 0.572558495  | 0.0027878 |
| 227731 | Slc25a25      | -0.735360201 | 0.0028213 |
| 216871 | Gltpd2        | -0.496213512 | 0.0028249 |
| 12737  | Cldn1         | 0.463031993  | 0.0029293 |
| 239122 | Setdb2        | -0.467063309 | 0.0029784 |
| 17524  | Mpp1          | 0.574947432  | 0.0029846 |
| 56451  | Suclg1        | 0.427214633  | 0.0030462 |
| 20324  | Sdpr          | 0.448468473  | 0.0031201 |
| 13636  | Efna1         | 0.504044743  | 0.0031423 |
| 100727 | Ugt2b34       | -0.604127649 | 0.0031494 |
| 21817  | Tgm2          | -0.565343094 | 0.0031563 |
| 15040  | H2-T23        | 0.745940872  | 0.0032338 |

|        |               |              |           |
|--------|---------------|--------------|-----------|
| 52538  | Acaa2         | 0.477693658  | 0.0032491 |
| 23991  | Cib1          | -0.440371775 | 0.0032754 |
| 14685  | Gnat1         | 0.502585374  | 0.0033323 |
| 234199 | Fgl1          | 0.650653302  | 0.003374  |
| 66841  | Etfdh         | 0.499879159  | 0.0033873 |
| 23872  | Ets2          | 0.589581825  | 0.0035703 |
| 13688  | Eif4ebp2      | 0.503848449  | 0.0035962 |
| 11363  | Acadl         | 0.571243614  | 0.0036115 |
| 268697 | Ccnb1         | 0.537765836  | 0.0037063 |
| 19294  | Pvrl2         | -0.45652104  | 0.0038228 |
| 23945  | Mgl1          | -0.495120287 | 0.0038504 |
| 16431  | Itm2a         | 0.451916664  | 0.003878  |
| 11607  | Agtr1a        | 0.447017166  | 0.0038805 |
| 18708  | Pik3r1        | -0.463652234 | 0.003889  |
| 83429  | Ctns          | -0.54587859  | 0.0038958 |
| 55949  | Eef1b2        | 0.490409913  | 0.0039081 |
| 71982  | Snx10         | -0.561700924 | 0.0040719 |
| 19043  | Ppm1b         | -0.530468335 | 0.0042763 |
| 21780  | Tfam          | 0.474629949  | 0.0043318 |
| 12796  | Camp          | 0.468797048  | 0.0043554 |
| 72465  | Zfp131        | -0.440391478 | 0.0044848 |
| 217869 | Eif5          | 0.476014462  | 0.0045509 |
| 108176 | Npm3-ps1      | -0.428438267 | 0.0047478 |
| 14991  | H2-M3         | 0.445756223  | 0.0050002 |
| 53861  | Zranb2        | -0.432576045 | 0.0050288 |
| 19731  | Rgl1          | 0.453284016  | 0.0050651 |
| 215751 | BC013529      | -0.43193746  | 0.0051156 |
| 278180 | Vsig4         | 0.557675343  | 0.0051832 |
| 12408  | Cbr1          | 0.431559033  | 0.0052716 |
| 66359  | 2310005N03Rik | 0.459919343  | 0.0053423 |
| 76187  | Adhfe1        | 0.578382902  | 0.0055678 |
| 16561  | Kif1b         | -0.48543779  | 0.0056206 |
| 75599  | Pcdh1         | -0.509910379 | 0.0058261 |
| 27060  | Tcirg1        | 0.430302257  | 0.0059119 |
| 72106  | 2610003J06Rik | -0.438259448 | 0.0059493 |
| 26914  | H2afy         | 0.467805407  | 0.0060004 |
| 70686  | Dusp16        | -0.504061985 | 0.0060529 |
| 110842 | Etfa          | 0.433962072  | 0.0062107 |
| 223631 | BC025446      | -0.466224175 | 0.0066796 |
| 13421  | Dnase113      | 0.500647052  | 0.0067074 |
| 71839  | Osgin1        | 0.493837768  | 0.0069453 |

|        |              |              |           |
|--------|--------------|--------------|-----------|
| 54401  | Ywhab        | -0.488717142 | 0.0069859 |
| 14130  | Fcgr2b       | 0.5302505    | 0.007147  |
| 15944  | Irgm1        | 0.68094327   | 0.0072674 |
| 66049  | Rogdi        | 0.429922601  | 0.0073789 |
| 55963  | Slc1a4       | 0.44713656   | 0.0075711 |
| 1E+08  | LOC100044862 | -0.469704752 | 0.0078375 |
| 19736  | Rgs4         | -0.528577291 | 0.0082755 |
| 74117  | Actr3        | 0.559906457  | 0.0088843 |
| 69674  | Mif4gd       | -0.577885956 | 0.0094863 |
| 1E+08  | LOC100048622 | 0.454750675  | 0.0098363 |
| 12033  | Bcap29       | 0.466509316  | 0.0101493 |
| 17105  | Lyz2         | 0.597593736  | 0.0103917 |
| 64384  | Sirt3        | 0.436052025  | 0.0108412 |
| 219132 | D14Ert668e   | -0.437187678 | 0.0109077 |
| 26876  | Adh4         | -0.431327054 | 0.0134259 |
| 55978  | Ift20        | -0.45543279  | 0.0135297 |
| 16819  | Lcn2         | 0.571991632  | 0.0147178 |
| 20848  | Stat3        | 0.508216222  | 0.0155279 |
| 66113  | Apoa5        | -0.506793242 | 0.0156707 |
| 101214 | Tra2a        | -0.454643448 | 0.0160552 |
| 1E+08  | LOC100047935 | 0.445686546  | 0.0168691 |
| 20249  | Scd1         | 0.459295081  | 0.0204228 |
| 231386 | Ythdc1       | -0.429129931 | 0.0344539 |
| 15510  | Hspd1        | -0.500109793 | 0.04821   |

---

**Table S2. Primers for quantitative real-time PCR**

| Genes          | Forward primer           | Reverse primer           |
|----------------|--------------------------|--------------------------|
| <i>Rplp0</i>   | ACTGGTCTAGGACCCGAGAAG    | TCCCACCTTGTCTCCAGTCT     |
| <i>Cyp2b9</i>  | GCTCATTCTCTGGTCAGATGTTT  | CGCTTGTGGTCTCAGTTCCA     |
| <i>Cyp2b10</i> | AAAGTCCCGTGGCAACTTCC     | TTGGCTCAACGACAGCAACT     |
| <i>Cyp2b13</i> | TTTTCTTCCAGTGTGTTACAGCC  | AACGCAGGAACTGTTTCATCTG   |
| <i>Cyp2c70</i> | AGTATGGCCCTGTGTTTACTGT   | GCCTTGGCTGGTTCTACTGAG    |
| <i>Cyp2f2</i>  | GGACCCAAACCTCTCCCAATC    | CCGTGAACACCGACCCATAC     |
| <i>Aldh1a1</i> | ATACTTGTCTGGATTTAGGAGGCT | GGGCCTATCTTCCAAATGAACA   |
| <i>Aldh1a7</i> | ACTTGGAAGTTAGGCCCTGC     | TGTGAAGGACACTTTGTTCGATG  |
| <i>Adh1</i>    | GCAAAGCTGCGGTGCTATG      | TCACACAAGTCACCCCTTCTC    |
| <i>Adh4</i>    | TGGCAGTCCCCTTTGCATT      | ACTACCGGGAAGAGAGCTTTC    |
| <i>Ces2g</i>   | AGGTCCAAGGCAGGCTCAT      | GGCCCTCCATATTCATCGTAACA  |
| <i>Ces3b</i>   | AGCTCCTAGCAGACCAGCAAT    | AAGGGCCGTGAAATCTCCAAC    |
| <i>Fmo1</i>    | ACAGCCGACAGTATAAACATCCA  | CCCTCCAGTAGTGCTGAGGAA    |
| <i>Fmo3</i>    | ACTGGTGGTACACAAGGCAG     | ATGGTCCCATCCTCAAACACA    |
| <i>Gstk1</i>   | GGTCCTATGCAGATACCAACAC   | GTACTGGCCTTTTCGGGGAA     |
| <i>Gstm2</i>   | ACACCCGCATACAGTTGGC      | TGCTTGCCCAGAAACTCAGAG    |
| <i>Gsto1</i>   | ATCCGGCACGAAGTCATCAAT    | TGACAGATTCGGTGACCAAGT    |
| <i>Ugt2b34</i> | TGAAGTGATGGTTCTGAGACCT   | ACTGCTTTGGCAGCTCATAAAT   |
| <i>Ugt2b35</i> | CCTGCTAAGCCCTTGCCTAAG    | AAATTGCGTTGGCCCTTTCTT    |
| <i>Sult2a1</i> | GATCCAAACTGTGCCCATTTG    | GATGGGAAGATGGGAGGTTATG   |
| <i>Shp</i>     | TGGGTCCCAAGGAGTATGC      | GCTCCAAGACTTCACACAGTG    |
| <i>Cyp7a1</i>  | TCAAGCAAACACCATTCCTG     | GGCTGCTTTTCATTGCTTCA     |
| <i>Cyp27a1</i> | CCTCACCTATGGGATCTTCATC   | TTTAAGGCATCCGTGTAGAGC    |
| <i>Cyp8b1</i>  | CAGGAAGTTCCGTTCGATTTG    | GGCCCCAGTAGGGAGTAGAC     |
| <i>Baat</i>    | AGGTAAAGGAAAGCCGCATC     | GTCAATGACCCCTGGAAAAG     |
| <i>Ntcp</i>    | CAAACCTCAGAAGGACCAAACA   | GTAGGAGGATTATTCCTCGTTGTG |
| <i>Bsep</i>    | TCTGACTCAGTGATTCTTCGCA   | CCCATAAACATCAGCCAGTTGT   |
| <i>Oatp2</i>   | GCTTTTCCAAGATCAAGGCATTT  | CGTGGGGATAACCGAATTGTCT   |
| <i>Oatp-b</i>  | CTCAGGACTCACATCAGGATGC   | CTCTTGAGGTAGCCAGAGATCA   |
| <i>Mdr1</i>    | CTGTTGGCGTATTTGGGATGT    | CAGCATCAAGAGGGGAAGTAATG  |
| <i>Mdr2</i>    | CAGCGAGAAACGGAACAGCA     | TCAGAGTATCGGAACAGTGTCA   |
| <i>Mrp2</i>    | GTGTGGATTCCCTTGGGCTTT    | CACAACGAACACCTGCTTGG     |
| <i>Mrp3</i>    | CTGGGTCCCCTGCATCTAC      | GCCGTCTTGAGCCTGGATAAC    |
| <i>Mrp4</i>    | GGCACTCCGGTTAAGTAACTC    | TGTCACCTGGTTCGAATTTGTTCA |
| <i>Hnf1a</i>   | AACACCTCAACAAGGGCACTC    | CCCCACTTGAAACGGTTCCT     |
| <i>C/ebpβ</i>  | GGGTTTCGGGACTTGATGCAAT   | CAACAACCCCGCAGGAACATCT   |
| <i>Rxra</i>    | GGACTGCCTGATTGACAAGC     | TTCAGCCCCATGTTTGCCTC     |
| <i>Foxa2</i>   | CCCTACGCCAACATGAACTCG    | GTTCTGCCGGTAGAAAGGGA     |

|                 |                         |                                |
|-----------------|-------------------------|--------------------------------|
| <i>Il-1β</i>    | GCAACTGTTTCCTGAACTCAACT | ATCTTTTGGGGTCCGTCAACT          |
| <i>Il-6</i>     | TAGTCCTTCTACCCCAATTTCC  | TTGGTCCTTAGCCACTCCTTC          |
| <i>Tnfα</i>     | CACCACCATCAAGGACTCAA    | AGGCAACCTGACCACTCTCC           |
| <i>Pepck</i>    | AGATGGAGGAAGAGGGCATC    | GGTCAGTGAGAGCCAACCA            |
| <i>G6pc</i>     | AGTTGTTGCTGGAGTCCTGTC   | GGCTGGCATTATAGATGCTGT          |
| <i>Gpt1</i>     | TCCAGGCTTCAAGGAATGGAC   | CAAGGCACGTTGCACGATG            |
| <i>Gpt2</i>     | AACCATTCAGTGAAGTAATCCGA | GGGCTGTTTAGTAGGTTTGGGTA        |
| <i>Asl</i>      | CTATGACCGGCATCTGTGGAA   | AGCAACCTTGTCCAACCCTTG          |
| <i>Cps1</i>     | ACATGGTGACCAAGATTCCTCG  | TTCCTCAAAGGTGCGACCAAT          |
| <i>Acy3</i>     | GCACCCACGGGAATGAGATG    | GAGCGGTTGAGATCACGGTC           |
| <i>Kynu</i>     | GTCAAGCCTGCGTTAGTGG     | GGAGGGTTTGAAATTCGGAATCC        |
| <i>Tdo2</i>     | TGGCAATTACTTGCAGTTGGA   | GTGCTCGTCATGGATTTTGTTC         |
| <i>Ccbl1</i>    | CGAAGGCTGGAAGGGATCG     | GCGGTGAGAAGTCAGGGAA            |
| <i>Ddc</i>      | TAGCTGACTATCTGGATGGCAT  | GTCTCTGATGTTTCTGGCTC           |
| <i>Hao</i>      | GAACGCCGTGTGAGAGTGAA    | CCAACGAACATGATTTTGAGCTG        |
| <i>Alas1</i>    | TCGCCGATGCCAATTCTTATC   | GGCCCCAACTTCCATCATCT           |
| <i>Gldc</i>     | CTCCTGCCCAGACACGATG     | GGACCGTCTTCTCGATGAGC           |
| <i>Gnmt</i>     | AAGAGGGCTTCAGCGTGATG    | CTGGCAAGTGAGCAAACTGT           |
| <i>Cbs</i>      | GGGACAAGGATCGAGTCTGGA   | AGCACTGTGTGATAATGTGGG          |
| <i>Prodh</i>    | GCACCACGAGCAGTTGTTC     | CTTTGTTGTGCCGGATCAGAG          |
| <i>Etv4</i>     | CGCACAGACTTCGCCTACG     | CAGACATCATCTGGGAATGGTC         |
| <i>Oatp2*</i>   | CGACTTGTTCTCCTTTTATCAG  | TAGCACCTACATCAGGTTGC           |
| <i>Fmo3*</i>    | TGGAAATCAGTAGGCATAGG    | ACACTACTAGAAAAGTTGGACTCG       |
| <i>Ugt2b34*</i> | CATGTCCCATTATGGCTTAG    | GAACATTGTATGAAATAGACTCTTAATGAC |
| <i>Sult2a1*</i> | GTCCTATTACGTCTTCCTG     | GTAACCTTTGACTGTAGGTG           |
| <i>Cyp2b10*</i> | GCACTCCAGTGACTTAGG      | CCACCATCAACTTGCCTG             |

---

\* : The primer pairs used for ChIP-qPCR.
